# Supplementary material
Source: publisher figshare collection journal article supplement (https://gsapubs.figshare.com/ndownloader/files/26909960)
Supplement: Supplementary file 1 [file 26909960]

## Sheet: Pleist_Holocene_Volcanos
Volcano_Number	Latitude	Longitude	Slab Depth	Slab Thickness	Slab Strike	Slab Dip
351001	5.65	-74.961	-90.3025	70.5267	78.4212	16.9791
351002	5.514	-75.043	-94.8659	70.7424	77.7172	18.9345
351011	5.203	-75.363	-103.307	70.2709	67.9196	22.3622
351012	5.091	-75.293	-108.714	70.0352	68.1237	24.8489
351020	4.892	-75.324	-119.092	69.0959	65.4106	28.8859
351021	4.818	-75.365	-123.38	68.4032	62.5724	30.1387
351800	4.8	-75.458	-120.336	68.2081	59.7565	29.2571
351801	4.701	-75.386	-127.563	67.6538	59.5293	31.1406
351030	4.658	-75.33	-132.246	67.4181	59.9332	32.1425
351040	4.487	-75.389	-139.39	66.3048	55.462	33.0388
351050	2.93	-76.03	-158.462	58.2733	17.8954	35.3676
351060	2.32	-76.4	-147.784	55.8947	19.5351	33.5394
351807	2.2	-76.03	-176.166	56.1442	17.9131	36.6506
351061	2.108	-76.592	-139.937	55.0462	24.967	31.7571
351808	1.92	-76.23	-169.322	55.1855	22.7471	35.2023
351809	1.83	-76.45	-157.123	54.6456	26.1133	33.1885
351062	1.666	-76.814	-143.139	52.9213	33.0897	30.2053
351810	1.568	-76.857	-144.005	52.3191	33.7415	29.7421
351070	1.5	-76.936	-140.588	51.735	34.6516	29.1196
351080	1.22	-77.37	-131.204	48.957	33.1676	26.734
351090	1.08	-77.68	-118.118	47.4874	32.0421	25.2533
351100	0.95	-77.87	-115.417	46.5841	28.8942	23.8584
351110	0.817	-77.938	-114.456	45.9279	25.6849	22.5745
352804	0.711	-77.784	-122.658	45.9753	21.4223	22.5907
352805	0.687	-78.021	-114.29	45.5893	23.7352	21.7538
352806	0.621	-78.007	-115.964	45.3826	21.4127	21.1116
352001	0.552	-77.58	-133.6	45.9829	15.1476	22.5627
352801	0.526	-78.365	-103.512	44.8402	26.2273	20.1603
352800	0.484	-78.329	-104.393	44.7936	25.5759	19.7563
352002	0.468	-78.287	-107.011	44.798	24.0611	19.3364
352802	0.364	-78.351	-106.814	44.7041	23.8197	18.6087
352003	0.308	-78.364	-107.554	44.6912	23.3021	18.2557
352004	0.258	-78.183	-113.312	44.767	19.941	18.1707
352005	0.13	-78.27	-112.858	44.7338	20.1907	17.5039
352803	0.127	-78.154	-116.197	44.7789	18.3606	17.819
352011	0.038	-78.463	-107.752	44.7511	22.6363	16.7614
352006	0.029	-77.986	-122.406	44.8516	15.7274	18.1097
1466	0	-79.4138	-72.7868	45.4522	25.9116	27.3336
352808	-0.036	-78.48	-107.488	44.859	22.2114	16.3015
352807	-0.076	-78.207	-117.308	44.8656	18.8876	16.8951
352010	-0.077	-77.656	-136.904	44.998	13.3028	20.5452
352020	-0.171	-78.598	-105.721	45.0401	21.8377	15.9438
352809	-0.174	-78.2	-117.854	44.9106	18.9474	16.8593
352810	-0.259	-78.418	-112.752	45.0968	19.5311	16.0493
352021	-0.353	-78.617	-107.879	45.4163	18.7422	15.4095
352022	-0.375	-78.25	-119.011	45.2735	18.865	16.9529
352812	-0.43	-77.72	-139.272	45.1182	20.2454	21.1679
352811	-0.462	-78.478	-111.774	45.5585	17.4354	15.7611
352030	-0.481	-78.141	-123.437	45.4016	19.0912	17.8596
352815	-0.528	-78.658	-108.217	45.9745	15.4288	15.2381
352031	-0.53	-78	-129.295	45.4021	19.8845	19.0278
352813	-0.534	-78.371	-117.382	45.6697	17.2329	16.8294
352040	-0.538	-77.626	-142.872	45.2196	20.4623	21.96
352814	-0.578	-78.504	-113.122	45.9541	15.5175	16.066
352816	-0.648	-78.631	-108.983	46.2874	13.7607	15.358
352041	-0.659	-78.714	-107.51	46.3516	13.4855	15.1469
352050	-0.677	-78.436	-115.545	46.2079	14.5415	16.6742
352826	-0.804	-78.3	-121.45	46.3724	14.2668	17.958
352060	-0.85	-78.9	-102.837	47.4299	8.63679	14.8139
2180	-0.9	-79.4152	-87.0922	48.4314	9.07706	19.1714
352817	-0.962	-78.56	-114.013	47.3437	9.07432	16.6919
352818	-1.151	-78.666	-111.452	48.5826	3.18198	16.3716
352819	-1.381	-78.572	-114.592	50.1498	353.154	16.9514
352821	-1.404	-78.75	-108.078	50.4847	354.135	15.8978
352820	-1.459	-77.917	-137.243	49.6555	340.065	18.937
352071	-1.464	-78.815	-106.335	50.9686	352.278	15.6404
352080	-1.467	-78.442	-117.733	50.3952	349.578	17.3812
352822	-1.49	-78.639	-110.79	51.134	348.911	16.3513
352823	-1.634	-78.728	-106.516	52.6454	342.503	15.6856
352824	-1.67	-78.42	-117.377	52.1262	336.369	17.5115
352081	-1.78	-78.613	-109.058	53.8788	331.643	16.2946
352090	-2.005	-78.341	-111.784	55.648	315.391	17.7648
2646	-12.9314	-74.7583	-80.911	78.237	272.504	2.5989
2711	-13.315	-74.3533	-81.0664	78.7605	12.0445	2.84916
2643	-13.3435	-74.3502	-81.1319	78.7859	13.8102	3.08339
2681	-13.3474	-74.4426	-80.6259	78.7371	7.68323	2.41962
2493	-13.3544	-74.6147	-80.0368	78.6536	348.73	1.90564
2642	-13.3567	-74.34	-81.1319	78.7859	13.8102	3.08339
2512	-13.3664	-74.6494	-79.8642	78.6229	340.964	1.93054
2434	-13.4542	-71.8722	-115.964	79.7188	340.884	23.5913
1585	-13.5093	-71.6478	-125.426	79.9523	342.01	29.9952
1584	-13.5583	-71.7583	-119.056	79.876	342.008	25.976
1867	-13.577	-71.7146	-120.787	79.9767	342.731	27.1481
354801	-13.58	-71.72	-120.787	79.9767	342.731	27.1481
1866	-13.6183	-71.705	-120.787	79.9767	342.731	27.1481
1950	-13.623	-71.7086	-120.787	79.9767	342.731	27.1481
1421	-14.0967	-71.3667	-135.502	81.5313	353.106	33.236
1906	-14.097	-71.367	-135.502	81.5313	353.106	33.236
1305	-14.1683	-71.37	-135.109	81.6401	354.373	32.8266
354000	-14.176	-71.351	-134.799	81.7502	355.595	32.4641
1420	-14.2167	-71.3667	-134.799	81.7502	355.595	32.4641
2467	-14.6958	-70.7264	-180.958	83.9965	351.278	40.9824
2601	-14.75	-70.75	-180.241	84.0455	351.306	40.0558
2284	-15.063	-72.168	-98.5009	81.2337	3.21809	15.5566
2569	-15.0695	-72.9661	-86.9801	79.7897	306.103	4.14205
354001	-15.07	-73.18	-85.8784	79.6198	296.52	5.88348
2240	-15.1	-72.8483	-87.2107	79.9271	318.661	4.48658
2123	-15.1667	-71.9264	-105.646	82.0393	2.67705	20.2444
2492	-15.1672	-72.8784	-86.5681	79.9145	312.777	5.09723
1377	-15.1681	-73.3424	-83.6333	79.5829	300.247	8.92444
1529	-15.1871	-73.3375	-82.8466	79.6016	300.8	9.74878
2036	-15.2167	-71.8611	-109.911	82.4455	1.91812	22.2623
2491	-15.217	-72.867	-86.5601	80.0213	317.949	5.62262
354802	-15.23	-72.63	-88.2262	80.4058	338.02	7.10141
2201	-15.24	-72.86	-86.1719	80.0735	317.451	6.25328
2363	-15.2467	-72.8764	-85.7537	80.0065	312.925	6.36919
2402	-15.2517	-73.4167	-81.4502	79.5956	301.86	11.2663
2362	-15.2555	-72.898	-85.7537	80.0065	312.925	6.36919
2193	-15.2622	-71.7543	-114.555	82.8305	0.765423	23.967
1297	-15.2886	-73.3103	-81.6241	79.6732	301.606	10.8227
1387	-15.2933	-71.83	-109.987	82.6582	359.841	22.2702
354002	-15.33	-73.45	-78.7292	79.6086	303.096	13.7893
1916	-15.3413	-72.9965	-83.7746	79.9775	307.074	8.42133
2326	-15.35	-72.9319	-84.2539	80.0417	309.558	8.06962
1795	-15.3539	-73.0617	-83.297	79.919	305.179	8.84451
1926	-15.365	-72.9963	-83.7746	79.9775	307.074	8.42133
1925	-15.3652	-73.0182	-83.7746	79.9775	307.074	8.42133
2266	-15.371	-72.607	-88.3422	80.6714	338.14	8.62257
1712	-15.3765	-73.0718	-82.5591	79.9632	305.644	9.67492
354803	-15.4	-72.9	-84.1542	80.1701	312.425	8.57384
2122	-15.405	-72.746	-85.895	80.4348	323.591	8.31794
2120	-15.4067	-72.7467	-85.895	80.4348	323.591	8.31794
2114	-15.4165	-71.1575	-146.493	84.1641	348.895	28.4154
354004	-15.42	-72.33	-92.9008	81.4166	350.236	12.7539
1895	-15.4357	-73.3906	-77.1019	79.6818	303.487	14.9259
2461	-15.4499	-72.7589	-85.3845	80.5118	322.284	9.03229
1661	-15.475	-72.3817	-91.1715	81.4905	343.894	12.6725
1833	-15.495	-72.36	-92.3713	81.6356	346.048	13.4595
354003	-15.52	-72.65	-86.3317	80.8221	328.318	10.0475
2490	-15.5491	-72.8457	-82.7132	80.463	313.953	10.8153
2358	-15.5503	-72.8457	-82.7132	80.463	313.953	10.8153
2473	-15.5637	-73.1018	-79.244	80.0446	305.494	12.8652
2325	-15.5664	-73.087	-79.244	80.0446	305.494	12.8652
2285	-15.5687	-73.0841	-79.244	80.0446	305.494	12.8652
2554	-15.5715	-73.0863	-79.244	80.0446	305.494	12.8652
1464	-15.5733	-71.6	-120.903	83.6787	350.521	25.0824
2173	-15.575	-71.714	-115.647	83.5605	349.45	23.965
2507	-15.5861	-73.0513	-78.9317	80.1728	306.608	13.2579
2652	-15.5891	-73.0829	-78.1734	80.0973	305.713	13.7972
2024	-15.59	-71.826	-108.901	83.2377	350.107	22.1466
1921	-15.5913	-72.0216	-102.806	82.8629	349.596	19.9214
2023	-15.5917	-71.325	-135.61	84.1643	343.478	26.7357
2622	-15.5921	-73.0682	-78.9317	80.1728	306.608	13.2579
1913	-15.5954	-71.6159	-120.431	83.745	348.476	24.9221
1851	-15.5957	-72.0354	-100.94	82.7281	349.11	19.1144
1884	-15.597	-71.974	-104.758	82.9932	349.915	20.7006
2439	-15.5991	-72.9562	-80.419	80.3435	309.307	12.337
2460	-15.6011	-72.9743	-80.419	80.3435	309.307	12.337
1561	-15.6059	-71.5985	-120.431	83.745	348.476	24.9221
2022	-15.6099	-71.8707	-108.901	83.2377	350.107	22.1466
1758	-15.6153	-71.5833	-120.431	83.745	348.476	24.9221
2136	-15.6213	-72.0575	-100.94	82.7281	349.11	19.1144
1419	-15.625	-72.0194	-102.406	82.9612	347.499	20.0361
1636	-15.63	-71.6017	-119.871	83.808	346.332	24.7766
2464	-15.6319	-73.4883	-69.4261	79.7153	305.049	19.8761
2536	-15.6466	-73.0912	-77.027	80.1532	305.87	14.7381
1912	-15.6501	-72.0542	-100.54	82.8298	346.991	19.2729
2067	-15.6542	-71.7083	-115.152	83.6325	347.35	23.8674
1890	-15.6547	-72.1105	-98.7585	82.6939	346.291	18.493
2653	-15.6579	-73.0765	-77.027	80.1532	305.87	14.7381
2131	-15.6833	-72.1706	-96.5769	82.6594	343.135	17.985
2505	-15.6859	-73.3675	-71.047	79.8789	304.83	18.7577
2066	-15.6861	-71.7611	-112.313	83.6089	345.525	23.2888
2645	-15.6917	-73.0764	-75.8032	80.2125	305.973	15.6819
1519	-15.7032	-72.2482	-93.4152	82.375	340.588	16.5462
2634	-15.7154	-71.6037	-119.218	83.8679	344.109	24.6508
1883	-15.7194	-72.0361	-100.065	82.9288	344.786	19.4535
2747	-15.746	-72.756	-80.9252	81.0457	315.635	13.9866
2514	-15.7588	-72.9397	-77.2514	80.5672	308.679	15.1495
2459	-15.7627	-72.8896	-78.1557	80.6778	310.04	14.7568
2428	-15.7667	-72.75	-80.9252	81.0457	315.635	13.9866
2427	-15.7683	-72.7621	-80.9252	81.0457	315.635	13.9866
2426	-15.7728	-72.7464	-80.9252	81.0457	315.635	13.9866
2425	-15.773	-72.746	-80.9252	81.0457	315.635	13.9866
2458	-15.7772	-72.8873	-76.9939	80.764	309.658	15.7042
2657	-15.7843	-73.0681	-74.1041	80.437	306.642	17.0304
2502	-15.7858	-72.6683	-81.9736	81.4223	319.055	14.7392
354006	-15.787	-71.857	-106.685	83.5604	341.344	22.2557
2633	-15.797	-71.808	-108.787	83.6558	341.232	22.7733
2632	-15.7971	-71.8075	-108.787	83.6558	341.232	22.7733
2543	-15.8075	-72.9818	-75.0745	80.5395	307.431	16.544
2457	-15.8083	-72.8917	-76.9939	80.764	309.658	15.7042
2656	-15.82	-73.0581	-74.1041	80.437	306.642	17.0304
2489	-15.829	-71.006	-144.056	84.5571	324.734	27.2083
2488	-15.8292	-71.0042	-144.056	84.5571	324.734	27.2083
354005	-15.83	-72.13	-94.6417	82.9608	336.198	19.001
2065	-15.8333	-71.8125	-107.99	83.7233	338.911	22.8291
2639	-15.8588	-73.099	-71.6573	80.4105	306.028	18.4608
2511	-15.883	-73.1433	-69.0042	80.3838	305.645	19.844
1949	-15.887	-71.621	-115.676	84.0778	334.862	24.4144
2541	-15.9278	-73.0726	-69.6425	80.6699	306.348	19.7343
2562	-15.9316	-73.0905	-68.4988	80.5588	305.919	20.1908
2540	-15.9335	-73.1028	-68.4988	80.5588	305.919	20.1908
2561	-15.935	-73.093	-68.4988	80.5588	305.919	20.1908
2501	-15.9625	-73.265	-64.9404	80.266	305.336	21.6108
2568	-15.9846	-73.0803	-66.8054	80.6376	305.838	20.9935
2265	-16.0217	-71.5556	-115.471	84.2209	329.675	24.7484
354007	-16.191	-71.53	-109.637	84.3635	321.784	25.1142
1672	-16.1967	-71.6783	-103.75	84.2225	323.286	24.5223
1671	-16.1967	-71.6783	-103.75	84.2225	323.286	24.5223
2456	-16.21	-71	-130.719	84.7011	312.205	27.1248
1709	-16.2236	-71.5111	-111.603	84.4043	321.122	25.2952
1471	-16.227	-71.445	-111.843	84.4704	318.775	25.5658
354008	-16.261	-71.754	-100.272	84.2095	321.841	24.5521
1794	-16.2833	-71.4917	-108.17	84.4626	317.955	25.537
354010	-16.294	-71.409	-111.939	84.5302	316.56	25.802
1491	-16.297	-71.468	-110.059	84.4974	317.285	25.6699
2707	-16.2981	-71.6465	-102.467	84.3433	319.557	25.1185
1402	-16.304	-71.435	-110.059	84.4974	317.285	25.6699
1446	-16.313	-71.444	-110.059	84.4974	317.285	25.6699
2375	-16.3468	-71.5935	-102.62	84.4165	317.661	25.4472
2706	-16.348	-71.597	-102.62	84.4165	317.661	25.4472
2369	-16.35	-71.5967	-102.62	84.4165	317.661	25.4472
1418	-16.3517	-71.43	-108.218	84.5234	315.926	25.7804
2315	-16.3533	-71.5597	-104.494	84.4544	317.148	25.5604
354020	-16.355	-70.903	-127.565	84.7974	306.851	27.3855
2443	-16.3605	-71.7654	-96.9824	84.2862	318.732	25.0835
1200	-16.3619	-70.8809	-127.565	84.7974	306.851	27.3855
1183	-16.3655	-70.8865	-127.565	84.7974	306.851	27.3855
1362	-16.368	-71.396	-110.063	84.5549	315.23	25.8901
1189	-16.3691	-70.8903	-127.565	84.7974	306.851	27.3855
1298	-16.375	-71.468	-106.324	84.5485	314.695	25.8952
2745	-16.3833	-71.6	-100.808	84.446	316.357	25.6385
1336	-16.39	-71.457	-106.324	84.5485	314.695	25.8952
2405	-16.3967	-71.6233	-100.808	84.446	316.357	25.6385
1192	-16.4057	-70.8373	-126.855	84.8337	305.126	27.4843
2403	-16.4644	-71.9593	-86.0507	84.154	316.37	25.3367
354030	-16.608	-70.85	-117.354	84.9014	302.525	26.8102
1832	-16.7442	-70.5817	-116.999	85.04	299.679	26.611
1601	-16.75	-70.6	-116.999	85.04	299.679	26.611
354031	-16.755	-70.595	-116.999	85.04	299.679	26.611
2703	-16.8516	-69.6198	-142.182	85.4402	307.294	28.993
2783	-16.8516	-69.6198	-142.182	85.4402	307.294	28.993
2782	-16.8553	-69.559	-143.982	85.4577	307.72	29.0951
2702	-16.8956	-69.7074	-136.245	85.4221	307.312	28.2693
1675	-17.0133	-70.3847	-110.585	85.2008	301.903	24.9294
1639	-17.0201	-70.3915	-110.585	85.2008	301.903	24.9294
1948	-17.0212	-70.3836	-110.585	85.2008	301.903	24.9294
2756	-17.0238	-70.0346	-120.317	85.3297	305.306	25.9748
354040	-17.026	-70.372	-109.736	85.2377	303.021	24.569
2064	-17.1196	-70.3796	-106.319	85.2384	303.473	24.0882
354050	-17.184	-70.196	-107.725	85.3491	307.259	23.5738
2063	-17.2314	-70.1104	-108.692	85.4037	309.409	23.434
1463	-17.2653	-69.8847	-114.783	85.4734	311.74	24.1955
2083	-17.294	-70.19	-103.986	85.3864	309.273	22.8255
354804	-17.32	-69.9	-112.952	85.4901	312.685	23.7795
2650	-17.4	-69.4	-126.928	85.6483	319.44	25.4466
2649	-17.421	-69.939	-107.905	85.5063	314.029	22.8218
354060	-17.47	-69.813	-111.035	85.566	316.474	23.1053
2781	-17.5134	-69.6646	-114.482	85.6164	318.766	23.5045
1735	-17.5343	-70.0329	-100.03	85.5227	315.859	21.6809
2701	-17.5746	-69.5514	-116.442	85.647	320.554	23.724
2779	-17.5917	-69.5734	-114.914	85.6555	321.396	23.4223
2348	-17.6757	-69.5118	-113.807	85.6774	323.525	23.1584
2424	-17.6796	-69.5872	-110.239	85.6629	322.589	22.5784
1805	-17.6855	-69.7861	-103.492	85.6263	320.829	21.663
1376	-17.7007	-69.7822	-103.492	85.6263	320.829	21.663
1813	-17.7153	-69.7333	-105.135	85.6364	321.263	21.856
355010	-17.72	-69.77	-105.135	85.6364	321.263	21.856
1375	-17.721	-69.773	-105.135	85.6364	321.263	21.856
1503	-17.7256	-69.5751	-108.856	85.6701	323.402	22.3212
2470	-17.7567	-69.5948	-108.856	85.6701	323.402	22.3212
2472	-17.7888	-69.5114	-111.068	85.6885	325.109	22.6569
1962	-17.797	-69.7842	-100.783	85.6455	322.502	21.2567
1954	-17.8023	-69.7446	-102.427	85.6542	322.918	21.418
1681	-17.8068	-69.4262	-112.899	85.6936	325.591	22.9788
2306	-17.8518	-69.6432	-104.495	85.6762	324.553	21.6212
2021	-17.8557	-69.7493	-101.131	85.6621	323.724	21.2354
2374	-17.8598	-69.6356	-104.495	85.6762	324.553	21.6212
2391	-17.8664	-70.2078	-86.7374	85.5692	320.202	21.3151
2233	-17.8676	-69.4408	-111.588	85.6978	326.34	22.75
355805	-17.87	-69.48	-109.761	85.6932	325.869	22.4272
2700	-17.9485	-69.4899	-107.262	85.7011	327.307	22.0121
2241	-17.9764	-69.6389	-100.82	85.6923	326.784	21.1156
355810	-18.02	-69.08	-121.854	85.7208	331.91	25.1295
1664	-18.05	-69.2167	-116.395	85.7196	331.31	23.9991
355808	-18.05	-69.03	-122.853	85.7226	332.892	25.5014
1670	-18.0625	-69.2181	-116.395	85.7196	331.31	23.9991
355811	-18.07	-69.22	-116.395	85.7196	331.31	23.9991
1487	-18.0778	-69.1361	-117.305	85.7218	332.247	24.3293
2606	-18.0819	-69.4736	-105.57	85.7125	329.598	21.7949
1436	-18.0833	-69.5	-103.766	85.71	329.216	21.5026
1600	-18.0861	-69.1069	-119.449	85.7227	332.748	24.845
2081	-18.0922	-69.5117	-103.766	85.71	329.216	21.5026
355011	-18.1	-69.5	-103.766	85.71	329.216	21.5026
355809	-18.1	-68.88	-128.66	85.7252	334.827	26.9574
1599	-18.1003	-69.1029	-119.449	85.7227	332.748	24.845
1427	-18.1028	-69.4855	-103.766	85.71	329.216	21.5026
1326	-18.1053	-69.5239	-103.766	85.71	329.216	21.5026
1694	-18.1053	-69.1956	-115.221	85.7207	331.761	23.8316
1474	-18.1167	-69.125	-119.449	85.7227	332.748	24.845
2032	-18.1197	-69.4769	-103.766	85.71	329.216	21.5026
1278	-18.12	-69.5175	-103.766	85.71	329.216	21.5026
1374	-18.1272	-69.5219	-102.659	85.7124	329.778	21.3626
1351	-18.1292	-69.5153	-102.659	85.7124	329.778	21.3626
1742	-18.1311	-69.5478	-100.888	85.7099	329.43	21.1295
1373	-18.1363	-69.1631	-116.147	85.7228	332.629	24.1691
1325	-18.1364	-69.4994	-102.659	85.7124	329.778	21.3626
1324	-18.1389	-69.1684	-116.147	85.7228	332.629	24.1691
2077	-18.1472	-69.475	-104.459	85.7145	330.137	21.6417
1281	-18.15	-69.15	-116.147	85.7228	332.629	24.1691
1408	-18.1583	-69.4722	-104.459	85.7145	330.137	21.6417
1277	-18.1597	-69.4833	-102.659	85.7124	329.778	21.3626
355012	-18.166	-69.142	-116.147	85.7228	332.629	24.1691
1262	-18.1721	-69.1749	-116.147	85.7228	332.629	24.1691
1350	-18.1737	-69.1816	-114.072	85.7218	332.169	23.6637
1276	-18.1752	-69.1514	-115.011	85.7238	332.971	24.006
1695	-18.1836	-69.1428	-115.011	85.7238	332.971	24.006
1275	-18.1843	-69.1422	-115.011	85.7238	332.971	24.006
1349	-18.1856	-69.1728	-115.011	85.7238	332.971	24.006
1485	-18.1858	-69.1735	-115.011	85.7238	332.971	24.006
1285	-18.1858	-69.1655	-115.011	85.7238	332.971	24.006
1296	-18.1863	-69.1737	-115.011	85.7238	332.971	24.006
1323	-18.1871	-69.1747	-115.011	85.7238	332.971	24.006
1322	-18.1898	-69.1422	-115.011	85.7238	332.971	24.006
1321	-18.1901	-69.1178	-117.136	85.7245	333.419	24.5415
1348	-18.1903	-69.5653	-99.8079	85.7124	329.977	21.0224
1320	-18.191	-69.14	-115.011	85.7238	332.971	24.006
1347	-18.1926	-69.2431	-110.937	85.722	332.123	23.0156
1319	-18.1929	-69.1243	-117.136	85.7245	333.419	24.5415
1295	-18.1958	-69.2528	-110.937	85.722	332.123	23.0156
1294	-18.1977	-69.1388	-115.011	85.7238	332.971	24.006
1318	-18.198	-69.1411	-115.011	85.7238	332.971	24.006
1598	-18.1986	-69.1522	-115.011	85.7238	332.971	24.006
1317	-18.1992	-69.1277	-115.011	85.7238	332.971	24.006
1346	-18.2009	-69.1809	-112.946	85.7229	332.539	23.4953
1273	-18.2012	-69.1845	-112.946	85.7229	332.539	23.4953
1272	-18.2014	-69.1852	-112.946	85.7229	332.539	23.4953
1407	-18.2016	-69.175	-115.011	85.7238	332.971	24.006
1372	-18.2037	-69.1607	-115.011	85.7238	332.971	24.006
1379	-18.2047	-69.1131	-117.136	85.7245	333.419	24.5415
1345	-18.2074	-69.145	-115.011	85.7238	332.971	24.006
1316	-18.2084	-69.1288	-115.011	85.7238	332.971	24.006
1315	-18.2103	-69.2335	-110.937	85.722	332.123	23.0156
1371	-18.2113	-69.168	-115.011	85.7238	332.971	24.006
1344	-18.2122	-69.1547	-115.011	85.7238	332.971	24.006
1523	-18.2125	-69.1726	-115.011	85.7238	332.971	24.006
1653	-18.2153	-69.1367	-115.011	85.7238	332.971	24.006
1293	-18.2158	-69.2262	-110.937	85.722	332.123	23.0156
1314	-18.2184	-69.2743	-110.937	85.722	332.123	23.0156
1502	-18.2197	-69.1924	-112.946	85.7229	332.539	23.4953
1343	-18.2214	-69.2603	-110.937	85.722	332.123	23.0156
1369	-18.222	-69.2578	-110.937	85.722	332.123	23.0156
1693	-18.2221	-69.192	-112.946	85.7229	332.539	23.4953
1342	-18.2224	-69.2591	-110.937	85.722	332.123	23.0156
1652	-18.2283	-69.1415	-113.897	85.7248	333.281	23.8402
1341	-18.2285	-69.0842	-116.01	85.7255	333.704	24.3822
1484	-18.2294	-69.1478	-113.897	85.7248	333.281	23.8402
1680	-18.2306	-69.3042	-107.897	85.7221	332.113	22.409
1517	-18.2311	-69.1767	-111.843	85.724	332.874	23.3265
1674	-18.2333	-69.3083	-107.897	85.7221	332.113	22.409
355812	-18.241	-69.307	-107.897	85.7221	332.113	22.409
1804	-18.246	-69.336	-105.996	85.721	331.76	22.015
1284	-18.2479	-69.123	-116.01	85.7255	333.704	24.3822
355813	-18.37	-69.05	-115.967	85.7283	334.599	24.6268
355020	-18.42	-69.092	-112.744	85.7288	334.428	23.879
2539	-18.4361	-69.2181	-107.625	85.7286	333.969	22.6575
2538	-18.454	-69.216	-107.625	85.7286	333.969	22.6575
2679	-18.4681	-69.1958	-107.625	85.7286	333.969	22.6575
2778	-18.504	-69.262	-104.675	85.7291	333.919	22.0547
2676	-18.5042	-69.2625	-104.675	85.7291	333.919	22.0547
355021	-18.62	-68.75	-124.695	85.7363	337.967	27.6756
1901	-18.745	-69.048	-107.748	85.7354	336.218	23.2399
355814	-18.75	-69.05	-107.748	85.7354	336.218	23.2399
1812	-18.7639	-68.9717	-112.019	85.736	336.94	24.504
1905	-18.7806	-69.0667	-106.793	85.7355	336.425	23.0706
355815	-18.8	-68.3	-146.026	85.7353	341.876	31.7127
1861	-19.1153	-68.8431	-109.791	85.7257	338.818	24.6952
355032	-19.13	-68.53	-123.842	85.7169	340.608	29.0999
1462	-19.15	-68.8561	-108.873	85.7222	338.923	24.5034
1170	-19.155	-68.82	-111.148	85.7214	339.219	25.2691
2322	-19.1792	-67.0493	-215.59	85.6669	339.363	31.5465
2062	-19.3332	-68.9694	-101.184	85.7052	339.024	22.2711
2535	-19.3799	-68.9291	-100.377	85.6991	339.216	22.0436
2475	-19.3896	-67.3919	-189.736	85.6485	339.622	31.8506
355035	-19.463	-67.432	-185.459	85.6422	339.468	32.0824
355817	-19.5	-69.12	-93.202	85.6896	339.81	20.275
1958	-19.5131	-68.6174	-114.174	85.6749	339.845	26.8491
2304	-19.539	-68.5967	-113.209	85.6667	339.808	26.5431
355818	-19.55	-68.68	-108.476	85.6698	339.804	24.8663
2113	-19.5657	-68.6942	-108.476	85.6698	339.804	24.8663
1868	-19.5723	-68.6902	-108.476	85.6698	339.804	24.8663
2223	-19.5945	-68.5564	-114.721	85.6564	339.765	27.0556
2776	-19.5976	-68.9975	-95.4527	85.6705	340.294	20.5683
2171	-19.678	-68.8284	-99.7077	85.6469	340.458	21.6205
2170	-19.6813	-68.8303	-99.7077	85.6469	340.458	21.6205
2764	-19.7144	-68.8565	-99.7077	85.6469	340.458	21.6205
2763	-19.7176	-68.858	-99.7077	85.6469	340.458	21.6205
2372	-19.7239	-68.8462	-99.7077	85.6469	340.458	21.6205
2371	-19.7274	-68.8479	-98.9813	85.6366	340.728	21.2961
2455	-19.7667	-67.6375	-165.233	85.5916	338.78	33.2278
2716	-19.7923	-68.6698	-106.39	85.619	340.277	23.8899
2598	-19.8176	-68.6225	-108.612	85.6174	340.13	24.7308
2485	-19.8623	-68.6054	-107.753	85.6057	340.318	24.3272
2744	-19.8667	-67.5667	-168.993	85.5635	338.994	33.1243
1772	-19.9253	-68.7021	-101.98	85.584	341.262	21.908
355819	-19.958	-68.73	-100.026	85.5857	341.518	21.1917
1966	-19.9667	-68.825	-98.1374	85.5875	341.8	20.5466
1769	-19.9688	-68.729	-100.026	85.5857	341.518	21.1917
1540	-19.987	-68.7629	-99.356	85.5723	341.889	20.8209
1898	-19.9917	-68.7792	-97.4991	85.5741	342.193	20.1994
1721	-19.9927	-68.7835	-97.4991	85.5741	342.193	20.1994
1538	-19.9966	-68.7877	-97.4991	85.5741	342.193	20.1994
2432	-20.0069	-69.9	-56.7836	85.6225	347.261	22.4918
1986	-20.0102	-68.7755	-97.4991	85.5741	342.193	20.1994
2743	-20.0319	-69.9554	-54.1726	85.6124	347.694	22.4778
1947	-20.033	-68.825	-96.8864	85.56	342.615	19.8586
1977	-20.0363	-68.8183	-96.8864	85.56	342.615	19.8586
1435	-20.04	-68.829	-95.1119	85.5618	342.966	19.3505
1808	-20.0438	-68.835	-95.1119	85.5618	342.966	19.3505
2567	-20.0782	-69.8767	-55.8044	85.5958	348.131	22.4585
1894	-20.1135	-69.9134	-55.8044	85.5958	348.131	22.4585
1946	-20.2003	-70.0638	-48.5735	85.5754	348.816	22.1743
1669	-20.2388	-68.82	-94.6905	85.4984	344.533	18.5946
2169	-20.2389	-68.8662	-93.0194	85.5003	344.929	18.2021
2289	-20.5	-68.6	-99.1338	85.4055	345.716	19.3254
2288	-20.5014	-68.6667	-97.3967	85.4074	346.022	18.6833
355820	-20.52	-68.68	-95.7164	85.4093	346.36	18.1268
355821	-20.58	-68.45	-103.675	85.3656	345.899	20.9596
355822	-20.63	-68.45	-103.169	85.3487	346.329	20.641
355040	-20.73	-68.55	-98.6761	85.318	347.58	18.5639
1702	-20.7667	-68.6167	-97.0035	85.3194	347.86	17.9273
1831	-20.8155	-69.8744	-52.6721	85.3413	353	22.3408
1882	-20.8217	-69.8746	-52.6721	85.3413	353	22.3408
1985	-20.8333	-68.6333	-94.7041	85.2864	348.814	16.9414
1976	-20.8375	-68.6375	-94.7041	85.2864	348.814	16.9414
355042	-20.85	-68.2	-111.384	85.2768	347.087	23.7079
1757	-20.9099	-69.7893	-54.2687	85.2977	353.778	22.3521
2672	-20.9252	-69.8673	-51.9045	85.277	354.133	22.3205
1417	-20.9319	-68.5028	-98.841	85.2486	348.551	18.2795
355050	-20.939	-68.413	-102.345	85.2471	348.217	19.7947
2347	-20.9395	-69.8639	-51.9045	85.277	354.133	22.3205
1175	-20.942	-68.504	-98.841	85.2486	348.551	18.2795
1691	-20.9491	-69.7871	-54.0284	85.2761	354.15	22.3529
2370	-20.9686	-70.0441	-43.5486	85.2802	354.1	21.5419
2061	-20.9807	-69.7652	-55.9273	85.2532	354.522	22.3208
1583	-20.9916	-69.1694	-78.9823	85.2426	353.266	17.4544
1756	-20.992	-69.1615	-78.9823	85.2426	353.266	17.4544
1990	-21.1903	-68.4528	-98.7719	85.1525	349.41	18.003
2019	-21.1987	-68.4641	-98.7719	85.1525	349.41	18.003
1880	-21.2058	-68.5147	-97.1516	85.1525	349.499	17.3153
2630	-21.2122	-68.5675	-95.5944	85.1525	349.622	16.7034
355823	-21.22	-68.47	-98.7719	85.1525	349.41	18.003
1792	-21.221	-68.469	-98.7719	85.1525	349.41	18.003
1755	-21.2292	-68.5056	-96.8394	85.1301	349.635	17.1576
355824	-21.25	-67.75	-129.341	85.1458	348.976	28.2484
1791	-21.2667	-68.1931	-107.62	85.1331	349.469	21.8864
1720	-21.2694	-68.2694	-105.617	85.1323	349.477	21.0386
2482	-21.271	-68.5054	-96.8394	85.1301	349.635	17.1576
1975	-21.2847	-68.2014	-107.218	85.1103	349.7	21.711
2076	-21.2875	-68.1875	-107.218	85.1103	349.7	21.711
1768	-21.2944	-68.2597	-105.233	85.1093	349.694	20.865
1911	-21.295	-68.26	-105.233	85.1093	349.694	20.865
2016	-21.3	-68.2167	-107.218	85.1103	349.7	21.711
355060	-21.3	-68.18	-107.218	85.1103	349.7	21.711
2031	-21.3003	-68.2167	-107.218	85.1103	349.7	21.711
1924	-21.3056	-68.1875	-107.218	85.1103	349.7	21.711
1516	-21.306	-68.18	-107.218	85.1103	349.7	21.711
1830	-21.308	-68.188	-107.218	85.1103	349.7	21.711
1923	-21.3111	-68.2597	-105.233	85.1093	349.694	20.865
1515	-21.3139	-68.175	-109.291	85.1115	349.701	22.5504
1764	-21.3153	-68.1681	-109.291	85.1115	349.701	22.5504
2738	-21.4667	-68.2833	-102.287	85.029	350.215	19.5708
355825	-21.5	-68.12	-109.83	85.0055	350.541	22.7566
2287	-21.5	-67	-170.815	85.0716	349.152	31.5499
2435	-21.5045	-68.2296	-103.796	85.0003	350.421	20.2633
2499	-21.5921	-68.4726	-96.3364	84.9297	350.422	16.9474
355827	-21.6	-66.88	-175.849	85.023	350.077	31.7824
2709	-21.6153	-67.8774	-118.187	84.9511	350.887	25.4594
2754	-21.6751	-68.27	-102.485	84.8621	350.902	19.7661
355828	-21.68	-67.47	-141.376	84.9156	350.737	29.3982
2625	-21.6836	-67.8897	-117.366	84.8793	351.137	25.2273
1497	-21.7568	-68.3194	-100.392	84.8216	350.911	18.8421
1886	-21.7669	-68.2823	-100.392	84.8216	350.911	18.8421
1856	-21.7707	-68.4498	-95.5107	84.8178	350.694	16.6622
355061	-21.787	-68.237	-101.863	84.7828	351.037	19.5368
2346	-21.8	-68.25	-101.863	84.7828	351.037	19.5368
2357	-21.8003	-68.25	-101.863	84.7828	351.037	19.5368
1483	-21.8075	-68.2058	-103.713	84.7845	351.096	20.3603
1910	-21.8164	-68.2051	-103.713	84.7845	351.096	20.3603
1567	-21.8179	-68.386	-96.7903	84.7785	350.835	17.2364
1524	-21.8182	-68.3999	-96.7903	84.7785	350.835	17.2364
1708	-21.8209	-68.2981	-100.095	84.7812	350.973	18.7322
1513	-21.8247	-68.4664	-95.2435	84.7774	350.769	16.5723
2165	-21.8251	-68.2346	-101.557	84.7409	351.076	19.4235
1368	-21.829	-68.203	-103.396	84.7427	351.13	20.2447
1366	-21.8368	-68.1533	-105.318	84.7446	351.177	21.0726
1942	-21.8427	-68.2281	-101.557	84.7409	351.076	19.4235
2317	-21.856	-68.1143	-107.325	84.7469	351.218	21.8945
1444	-21.8618	-68.4987	-93.5029	84.7346	350.787	15.8998
1433	-21.8729	-68.4875	-93.5029	84.7346	350.787	15.8998
2074	-21.8762	-68.1904	-103.081	84.6994	351.142	20.1289
355829	-21.88	-67.9	-115.79	84.7148	351.321	24.8141
355070	-21.888	-68.391	-96.2476	84.6936	350.938	17.0422
2119	-21.89	-68.236	-101.255	84.6977	351.095	19.3101
1525	-21.8994	-68.4696	-94.7195	84.6925	350.89	16.3937
1839	-21.9005	-68.3088	-99.5097	84.6962	351.043	18.5135
1559	-21.9041	-68.4839	-93.2509	84.6916	350.853	15.8187
1566	-21.9078	-68.3667	-97.8423	84.6948	350.99	17.753
2177	-21.9243	-68.167	-104.991	84.7014	351.185	20.9564
2142	-21.9335	-68.0858	-106.647	84.659	351.204	21.6639
1546	-21.9561	-68.3851	-95.9806	84.6493	350.967	16.9439
1395	-21.9614	-68.4566	-94.462	84.6483	350.933	16.303
355837	-21.98	-67.23	-150.129	84.6873	351.655	30.2156
355065	-21.981	-68.071	-108.363	84.6157	351.19	22.3602
2397	-21.9968	-68.0842	-106.31	84.6134	351.163	21.5472
2260	-22.0049	-68.2416	-100.655	84.6079	351.071	19.0794
1761	-22.0466	-68.2949	-98.6486	84.5601	351.008	18.1755
1654	-22.0474	-68.2133	-102.146	84.5631	351.052	19.7738
1573	-22.0482	-68.2622	-100.357	84.5615	351.029	18.9608
355830	-22.05	-67.97	-112.343	84.5743	351.171	23.8027
1703	-22.0506	-68.2102	-102.146	84.5631	351.052	19.7738
355831	-22.059	-68.228	-100.357	84.5615	351.029	18.9608
1904	-22.0617	-68.1904	-102.146	84.5631	351.052	19.7738
1565	-22.063	-68.2678	-100.357	84.5615	351.029	18.9608
355835	-22.08	-67.77	-121.502	84.5404	351.201	26.3514
1690	-22.09	-68.1989	-101.835	84.5157	350.982	19.6506
1896	-22.1286	-68.2616	-99.7617	84.4662	350.889	18.7143
1754	-22.1419	-68.2723	-99.7617	84.4662	350.889	18.7143
355832	-22.142	-68.108	-105.295	84.4711	350.915	21.1851
355834	-22.18	-67.95	-111.205	84.4289	350.853	23.4877
2481	-22.18	-67.5	-133.897	84.4655	351.331	28.6062
2480	-22.1833	-67.5125	-133.897	84.4655	351.331	28.6062
2560	-22.1857	-67.5154	-133.897	84.4655	351.331	28.6062
1828	-22.1864	-68.1847	-101.211	84.4188	350.787	19.3941
2678	-22.2167	-68.0322	-106.953	84.4241	350.81	21.8889
2504	-22.2234	-67.4256	-136.694	84.471	351.42	28.9739
2182	-22.2378	-68.1417	-102.712	84.3708	350.661	20.0897
2422	-22.25	-67.57	-130.689	84.4097	351.161	28.1899
355836	-22.25	-67.42	-139.072	84.4261	351.466	29.3253
2163	-22.2542	-68.1542	-102.712	84.3708	350.661	20.0897
355833	-22.27	-67.97	-110.819	84.379	350.715	23.3786
355838	-22.27	-67.18	-150.816	84.4499	352.01	30.5779
2421	-22.2917	-67.7625	-119.787	84.3408	350.743	26.092
2420	-22.292	-67.763	-119.787	84.3408	350.743	26.092
1984	-22.3007	-67.7613	-119.787	84.3408	350.743	26.092
1928	-22.3013	-67.7631	-119.787	84.3408	350.743	26.092
1827	-22.3197	-68.0083	-108.289	84.3261	350.543	22.463
355841	-22.33	-67.97	-110.035	84.2772	350.412	23.1512
1974	-22.3438	-67.7939	-116.904	84.2858	350.539	25.3747
2015	-22.4142	-68.05	-105.501	84.2212	350.217	21.366
355840	-22.42	-68.02	-107.526	84.2231	350.23	22.2091
355842	-22.439	-67.888	-111.417	84.1751	350.13	23.713
1826	-22.4503	-67.9639	-109.235	84.1727	350.096	22.9082
2454	-22.5167	-66.3833	-202.545	84.2602	355.958	36.3635
2054	-22.54	-66.97	-163.728	84.159	352.757	32.5274
355090	-22.557	-67.853	-112.809	84.0697	349.878	24.27
2419	-22.6262	-67.6788	-119.044	83.9668	349.837	26.2608
2550	-22.6667	-66.6667	-183.232	84.0728	354.12	34.7782
355091	-22.72	-67.892	-109.281	83.8971	349.481	23.0733
2141	-22.75	-68	-104.766	83.8338	349.371	21.1574
1825	-22.75	-67.5	-128.531	83.866	350.087	28.5502
2115	-22.7738	-67.9592	-106.762	83.8356	349.381	22.0501
355843	-22.82	-67.18	-145.486	83.8371	351.056	31.2021
355092	-22.83	-67.88	-107.986	83.7141	349.342	22.6102
2549	-22.84	-66.63	-181.569	83.8296	353.602	35.1943
355093	-22.895	-67.566	-124.255	83.6726	349.787	27.8558
2534	-22.8983	-68.215	-96.7284	83.64	349.623	17.0727
2106	-22.9336	-67.9819	-103.205	83.5792	349.433	20.4214
2038	-22.95	-67.75	-113.734	83.5911	349.493	24.8734
355094	-23	-67.75	-113.267	83.5227	349.559	24.7287
1981	-23.017	-67.683	-115.629	83.5259	349.603	25.541
1619	-23.017	-67.567	-123.216	83.5375	349.812	27.7113
2037	-23.0183	-67.8973	-106.723	83.5148	349.507	22.0822
355844	-23.02	-67.05	-152.817	83.591	351.405	32.5658
2258	-23.117	-68	-102.105	83.368	349.905	19.8128
355846	-23.13	-67.37	-132.738	83.3395	350.447	29.91
2283	-23.147	-67.012	-154.484	83.3792	351.561	33.1054
2697	-23.1667	-67.4167	-129.871	83.3343	350.342	29.3467
355845	-23.17	-67.07	-151.212	83.3735	351.368	32.7057
355847	-23.2	-67.67	-116.168	83.2363	350.234	25.77
2658	-23.22	-67.466	-126.56	83.2532	350.403	28.6624
355848	-23.23	-67.75	-111.07	83.1518	350.502	23.8907
355095	-23.236	-67.645	-115.719	83.1585	350.483	25.6149
2553	-23.25	-67.5	-123.352	83.1707	350.547	27.8947
355849	-23.252	-67.71	-113.349	83.155	350.486	24.7713
2537	-23.2712	-67.8796	-104.806	83.1438	350.627	21.0898
355096	-23.292	-67.618	-117.73	83.083	350.768	26.27
2548	-23.3025	-67.8314	-106.437	83.0669	350.916	21.841
355100	-23.37	-67.73	-110.291	82.992	351.18	23.5191
355850	-23.398	-67.582	-116.885	82.9209	351.442	25.9572
355851	-23.45	-67.82	-107.479	82.8249	352.098	22.2003
355097	-23.52	-67.67	-113.744	82.7519	352.325	24.7723
355852	-23.55	-67.77	-108.973	82.6617	352.981	22.7732
355098	-23.58	-67.7	-110.854	82.5819	353.389	23.5262
2749	-23.59	-67.88	-102.819	82.5688	353.896	19.7052
355853	-23.67	-67.72	-110.588	82.4989	353.91	23.3561
2696	-23.6739	-67.3874	-125.359	82.5247	353.299	28.2738
1779	-23.7348	-68.1847	-93.2742	82.2991	357.05	13.9506
355101	-23.743	-67.534	-117.016	82.3468	354.553	25.6661
2085	-23.7747	-68.4031	-88.7038	82.2837	358.591	11.6035
355854	-23.8	-67.5	-119.238	82.2705	354.885	26.3239
2532	-23.8128	-67.4874	-119.238	82.2705	354.885	26.3239
355102	-23.82	-67.77	-107.838	82.2493	355.656	21.9495
355103	-23.83	-67.95	-100.329	82.1533	356.915	17.9868
2217	-23.8347	-68.3694	-89.7176	82.1217	359.356	11.8691
2737	-23.9309	-67.4638	-121.106	82.0388	355.969	26.6472
1271	-23.939	-67.64	-111.62	82.02	356.76	23.3715
1824	-23.942	-68.1083	-95.6885	81.9821	358.671	15.0787
355104	-23.949	-67.74	-107.423	82.0113	357.137	21.5502
1823	-23.9656	-68.1292	-94.3596	81.9779	358.965	14.2716
1800	-23.9673	-68.1385	-94.3596	81.9779	358.965	14.2716
355105	-23.97	-68.13	-94.3596	81.9779	358.965	14.2716
1963	-23.9729	-68.1235	-95.6885	81.9821	358.671	15.0787
2390	-24	-66	-220.74	82.1336	352.632	38.7644
355856	-24.02	-67.85	-103.528	81.9255	357.959	19.5482
355855	-24.03	-67.53	-115.895	81.877	357.094	24.8001
355150	-24.05	-66.48	-181.134	82.0009	353.023	36.6267
1458	-24.06	-66.48	-181.134	82.0009	353.023	36.6267
2345	-24.1122	-69.339	-69.5375	81.596	7.35177	14.9988
2736	-24.1392	-66.3415	-191.472	81.8765	352.558	37.3663
2158	-24.1453	-67.2511	-130.965	81.7607	355.96	28.7305
1707	-24.15	-67.5333	-115.661	81.7298	357.613	24.5312
2187	-24.1667	-66.5667	-176.412	81.8487	352.825	36.1481
355106	-24.18	-68.25	-91.9939	81.592	1.59624	12.4645
355107	-24.188	-68.054	-97.0179	81.6113	0.227571	15.5258
355865	-24.2	-66.5	-179.588	81.7847	352.559	36.4305
1854	-24.2047	-66.5409	-175.9	81.7775	352.664	36.0593
2531	-24.25	-68	-98.4697	81.5457	0.147971	16.3346
2773	-24.25	-67.75	-107.014	81.5689	358.897	20.9112
2257	-24.25	-67.5	-117.791	81.593	357.619	25.0205
1618	-24.283	-66.5	-178.501	81.646	352.169	36.2538
355160	-24.29	-67.783	-105.095	81.4957	359.23	19.9124
2772	-24.29	-67.78	-105.095	81.4957	359.23	19.9124
1617	-24.3	-66.4	-185.961	81.6614	351.971	36.9576
2530	-24.3	-66	-217.253	81.7243	352.243	38.7448
355864	-24.309	-66.732	-160.806	81.61	353.067	33.9302
355108	-24.319	-68.59	-85.3966	81.4146	5.63214	9.69797
355109	-24.396	-68.246	-92.1671	81.3232	2.37014	12.1921
1261	-24.4	-68.25	-92.1671	81.3232	2.37014	12.1921
355857	-24.45	-68.4	-89.2034	81.2467	4.11498	10.5146
2156	-24.5597	-68.65	-85.0976	81.1059	7.68663	9.22588
2155	-24.5931	-68.5844	-86.0271	81.0584	7.31682	9.20594
2368	-24.6	-66.7	-161.27	81.2324	352.107	33.35
2344	-24.6795	-68.5792	-86.2616	80.9606	7.78836	9.01602
1752	-24.704	-67.184	-131.101	81.0675	354.254	27.3605
1751	-24.7167	-68.5333	-87.0612	80.9652	7.05068	9.16513
1361	-24.719	-68.537	-87.0612	80.9652	7.05068	9.16513
1360	-24.72	-68.54	-87.0612	80.9652	7.05068	9.16513
355110	-24.72	-68.53	-87.0612	80.9652	7.05068	9.16513
2154	-24.7233	-69.35	-72.3484	80.8925	11.2348	13.9603
1878	-24.729	-68.014	-98.5304	80.9594	359.72	15.3358
1987	-24.73	-66.17	-199.275	81.1494	351.109	38.4896
1537	-24.7432	-68.5176	-87.9806	80.9242	6.46245	9.29408
355866	-24.75	-66.17	-199.275	81.1494	351.109	38.4896
1359	-24.7566	-68.5633	-87.1723	80.92	7.2491	9.06673
1759	-24.7635	-68.53	-87.1723	80.92	7.2491	9.06673
1543	-24.8057	-68.3997	-89.7638	80.8887	5.00335	9.87948
1719	-25.0167	-68.3167	-91.8618	80.7446	3.80573	10.3939
1727	-25.03	-68.38	-90.2008	80.7072	5.70518	9.34193
2255	-25.03	-68.3	-91.9302	80.7123	3.94165	10.2723
1209	-25.0315	-68.3015	-91.9302	80.7123	3.94165	10.2723
1198	-25.0757	-68.3607	-91.1252	80.6795	4.98829	9.66237
355161	-25.078	-68.266	-92.9232	80.6842	3.23447	10.6944
1512	-25.08	-68.37	-91.1252	80.6795	4.98829	9.66237
1726	-25.082	-68.366	-91.1252	80.6795	4.98829	9.66237
355112	-25.083	-68.367	-91.1252	80.6795	4.98829	9.66237
1749	-25.0949	-68.3982	-90.2926	80.6771	5.88852	9.23427
1177	-25.0965	-68.4044	-90.2926	80.6771	5.88852	9.23427
2771	-25.1143	-68.6612	-86.5621	80.6632	10.2515	8.11567
1877	-25.1167	-68.5167	-88.7323	80.6718	7.70377	8.5743
1651	-25.1187	-68.5445	-87.9925	80.669	8.5941	8.34869
1686	-25.1229	-68.5446	-87.9925	80.669	8.5941	8.34869
1197	-25.1262	-68.5366	-88.1152	80.6408	8.80311	8.25012
1432	-25.1288	-68.5139	-88.8455	80.6435	7.91301	8.47501
1676	-25.1319	-68.5353	-88.1152	80.6408	8.80311	8.25012
1203	-25.137	-68.5645	-88.1152	80.6408	8.80311	8.25012
1876	-25.1378	-68.5629	-88.1152	80.6408	8.80311	8.25012
1171	-25.1378	-68.5107	-88.8455	80.6435	7.91301	8.47501
2452	-25.1386	-68.37	-91.2085	80.6509	5.18621	9.55019
1875	-25.14	-68.5514	-88.1152	80.6408	8.80311	8.25012
1176	-25.1406	-68.5492	-88.1152	80.6408	8.80311	8.25012
2053	-25.1473	-68.3883	-90.3863	80.6485	6.09262	9.12845
2450	-25.1505	-68.4558	-89.6005	80.646	7.00483	8.76881
2566	-25.16	-68.4371	-89.6005	80.646	7.00483	8.76881
1457	-25.1621	-68.5378	-88.1152	80.6408	8.80311	8.25012
355120	-25.168	-68.507	-88.8455	80.6435	7.91301	8.47501
2770	-25.1684	-68.5809	-87.4034	80.638	9.65738	8.09643
2708	-25.1703	-68.5818	-87.4034	80.638	9.65738	8.09643
2768	-25.1719	-68.5879	-87.4034	80.638	9.65738	8.09643
1182	-25.1839	-68.5236	-88.9604	80.6165	8.1397	8.37875
1705	-25.1977	-68.4635	-89.7061	80.619	7.2334	8.67009
1978	-25.2	-67.1	-132.768	80.676	352.171	27.6872
1710	-25.21	-68.5	-88.9604	80.6165	8.1397	8.37875
2528	-25.2104	-68.6183	-87.5367	80.6112	9.87528	8.0004
2552	-25.2132	-68.6288	-86.8463	80.6085	10.6673	7.91779
1941	-25.2229	-68.6174	-87.5367	80.6112	9.87528	8.0004
1920	-25.2357	-68.457	-89.814	80.5933	7.48715	8.57493
1205	-25.2387	-68.6139	-87.6714	80.5857	10.1093	7.90806
1762	-25.2404	-68.6129	-87.6714	80.5857	10.1093	7.90806
355858	-25.25	-68.63	-86.99	80.5829	10.8917	7.82384
2610	-25.2599	-68.4095	-90.5807	80.5957	6.57731	8.9254
1785	-25.268	-68.617	-87.6714	80.5857	10.1093	7.90806
1208	-25.2681	-68.6162	-87.6714	80.5857	10.1093	7.90806
2735	-25.3	-68.55	-88.493	80.5637	9.53568	7.97549
2695	-25.3094	-68.3014	-92.3069	80.5756	5.05589	9.68156
2734	-25.3105	-68.6191	-87.8078	80.5611	10.3656	7.82002
1685	-25.3167	-68.6	-87.8078	80.5611	10.3656	7.82002
1684	-25.3305	-68.599	-87.9462	80.5374	10.6512	7.73687
355121	-25.336	-68.521	-89.3187	80.5425	8.97545	8.11454
1184	-25.3394	-68.5929	-87.9462	80.5374	10.6512	7.73687
1606	-25.3397	-68.5938	-87.9462	80.5374	10.6512	7.73687
1605	-25.34	-68.52	-89.3187	80.5425	8.97545	8.11454
2694	-25.35	-68.29	-92.3926	80.552	5.38827	9.57298
2387	-25.3514	-68.586	-87.9462	80.5374	10.6512	7.73687
1456	-25.357	-68.6232	-87.9462	80.5374	10.6512	7.73687
355859	-25.37	-68.88	-83.9268	80.5205	13.7085	8.26289
1167	-25.4025	-68.6284	-87.4303	80.5117	11.7109	7.56945
355122	-25.414	-68.588	-88.087	80.5144	10.9731	7.65917
2386	-25.4167	-68.6333	-87.4303	80.5117	11.7109	7.56945
1302	-25.42	-68.59	-88.087	80.5144	10.9731	7.65917
2011	-25.4469	-68.6299	-87.5815	80.4893	12.057	7.49578
1821	-25.4516	-68.6269	-87.5815	80.4893	12.057	7.49578
2385	-25.4516	-68.6437	-87.5815	80.4893	12.057	7.49578
2440	-25.4527	-68.631	-87.5815	80.4893	12.057	7.49578
1194	-25.4544	-68.6301	-87.5815	80.4893	12.057	7.49578
2527	-25.5	-68.3	-92.681	80.4854	6.67234	9.27894
2719	-25.5091	-67.9786	-98.3848	80.4999	1.21855	12.4098
2733	-25.528	-68.794	-86.0049	80.437	14.3243	7.48645
1992	-25.53	-67	-135.168	80.5115	351.63	28.8119
355867	-25.55	-67.92	-100.698	80.4841	359.873	13.4513
2298	-25.5631	-68.5928	-88.5299	80.4483	12.2236	7.46398
2341	-25.5678	-68.6545	-87.8941	80.4456	12.8985	7.3684
2525	-25.6	-68.4	-91.3859	80.4379	9.55867	8.36879
2524	-25.616	-67.709	-105.912	80.4732	356.79	16.0321
2373	-25.6174	-67.7277	-104.51	80.471	357.657	15.2701
2565	-25.666	-66.878	-139.873	80.4731	351.727	30.2245
2563	-25.6661	-66.8784	-139.873	80.4731	351.727	30.2245
2570	-25.703	-66.879	-139.404	80.4533	351.65	30.215
2449	-25.7147	-68.7269	-87.1779	80.3755	15.4588	7.22186
2523	-25.7337	-66.8943	-138.932	80.4337	351.618	30.1903
1973	-25.75	-67.5	-111.727	80.422	354.943	18.4762
2438	-25.7777	-68.0548	-97.7694	80.3751	6.15828	10.9252
2641	-25.7909	-68.8205	-86.9619	80.3296	16.8763	7.24137
1820	-25.794	-67.702	-105.682	80.3944	359.08	14.861
1803	-25.7962	-67.7091	-105.682	80.3944	359.08	14.861
2655	-25.8294	-66.9216	-137.993	80.3948	351.727	30.0935
2718	-25.83	-67.3	-118.574	80.3879	353.068	21.7867
2418	-25.832	-67.748	-104.398	80.3718	0.826324	13.9184
2340	-25.8333	-67.8333	-102.032	80.3664	2.94652	12.7428
2616	-25.8399	-68.5929	-89.5733	80.3204	16.1876	7.28294
2693	-25.853	-67.31	-118.574	80.3879	353.068	21.7867
2605	-25.871	-68.8183	-87.1702	80.3079	17.5027	7.21665
2732	-25.872	-67.393	-114.811	80.3856	354.306	19.6982
2609	-25.8864	-68.8962	-86.1618	80.2797	17.9751	7.53432
2611	-25.8893	-68.5268	-90.3938	80.3019	16.3901	7.44078
2339	-25.9	-67.44	-112.924	80.3643	355.541	18.3457
2620	-25.9072	-68.7474	-87.9814	80.2893	18.0412	7.13002
2573	-25.9167	-66.8667	-140.45	80.3766	352.073	30.9462
355868	-25.93	-66.92	-137.086	80.3559	352.115	29.9376
2191	-25.9312	-68.6555	-89.3856	80.2737	18.1931	7.18102
2615	-25.9549	-68.7323	-88.2006	80.2673	18.7143	7.12708
2338	-25.9606	-68.5066	-91.2366	80.2833	16.5603	7.64943
2522	-25.9667	-68.45	-91.8907	80.2865	15.8501	7.88819
2757	-25.9677	-67.2892	-118.073	80.3482	353.813	21.0667
2051	-25.9733	-68.3451	-93.2746	80.2929	14.2741	8.45615
2297	-25.9735	-68.825	-87.6075	80.2641	18.7789	7.1901
2572	-25.975	-67.21	-121.83	80.3301	353.205	22.9831
2574	-25.9751	-67.2095	-121.83	80.3301	353.205	22.9831
2684	-25.98	-67.282	-117.852	80.3279	354.273	20.6997
2521	-25.987	-68.5164	-91.4548	80.2613	17.3749	7.66221
2153	-25.9912	-68.7882	-87.8368	80.2418	19.3929	7.18681
1313	-25.992	-67.543	-109.68	80.3195	358.678	15.8699
2604	-25.9924	-68.8541	-87.2389	80.2385	19.2978	7.30519
2590	-25.9972	-68.8052	-87.8368	80.2418	19.3929	7.18681
2216	-25.9972	-68.8051	-87.8368	80.2418	19.3929	7.18681
2589	-26	-67	-131.218	80.334	352.316	27.6552
2546	-26	-66.7	-148.951	80.3426	353.425	33.5606
2668	-26.0307	-68.4816	-91.6833	80.239	18.1441	7.68177
2603	-26.0478	-66.8898	-136.245	80.3164	352.795	29.7343
2602	-26.048	-66.89	-136.245	80.3164	352.795	29.7343
2760	-26.05	-67.422	-114.177	80.3042	356.351	18.2147
2571	-26.05	-67.4223	-114.177	80.3042	356.351	18.2147
2215	-26.1089	-68.6162	-90.6798	80.2097	19.8244	7.35361
2520	-26.1177	-68.4816	-91.9218	80.2163	18.8425	7.707
355180	-26.12	-67.4	-114.072	80.2829	356.984	17.8519
2686	-26.126	-66.955	-132.761	80.2746	353.688	28.2957
2687	-26.1263	-66.9554	-132.761	80.2746	353.688	28.2957
1683	-26.1298	-67.4264	-112.463	80.2592	358.647	16.5533
2551	-26.1342	-67.9744	-100.763	80.2302	10.4723	10.9065
1718	-26.14	-67.44	-112.463	80.2592	358.647	16.5533
355869	-26.18	-68.37	-94.4396	80.1799	18.1619	8.48495
2519	-26.2784	-67.3419	-115.398	80.1961	358.854	17.546
2417	-26.2882	-67.5942	-108.599	80.1827	4.37501	13.3975
2416	-26.2886	-67.5941	-108.599	80.1827	4.37501	13.3975
2710	-26.306	-67.39	-113.874	80.1937	359.778	16.5309
1557	-26.3293	-67.9555	-101.638	80.1348	13.2937	10.4731
1893	-26.372	-68.071	-99.8964	80.1278	15.1191	9.97817
1807	-26.3769	-68.7271	-90.4299	80.0545	21.0619	7.21988
2105	-26.3782	-68.7357	-90.4299	80.0545	21.0619	7.21988
1212	-26.38	-68.727	-90.4299	80.0545	21.0619	7.21988
1211	-26.3903	-68.5994	-92.2263	80.0652	20.6802	7.52464
1213	-26.3939	-68.5632	-92.8486	80.0687	20.4406	7.69419
1178	-26.3956	-68.7114	-91.0203	80.0581	20.9969	7.28125
1850	-26.3962	-68.7115	-91.0203	80.0581	20.9969	7.28125
355860	-26.4	-68.75	-90.4299	80.0545	21.0619	7.21988
1616	-26.4078	-68.0796	-99.3263	80.0994	16.1683	9.68905
1195	-26.408	-68.6969	-91.0203	80.0581	20.9969	7.28125
1615	-26.4081	-68.0795	-99.3263	80.0994	16.1683	9.68905
1221	-26.416	-68.6895	-91.0203	80.0581	20.9969	7.28125
2254	-26.4182	-68.6721	-91.6179	80.0617	20.8675	7.38489
1642	-26.4201	-68.7983	-89.8429	80.0509	21.0566	7.20654
1202	-26.425	-68.804	-90.0931	80.0253	20.5884	7.18755
1188	-26.425	-68.7979	-90.0931	80.0253	20.5884	7.18755
1231	-26.4271	-68.6741	-91.8723	80.0362	20.3371	7.3929
1191	-26.4275	-68.6836	-91.2724	80.0326	20.4723	7.28171
1650	-26.4283	-68.6839	-91.2724	80.0326	20.4723	7.28171
1204	-26.4358	-68.8116	-90.0931	80.0253	20.5884	7.18755
1224	-26.4385	-68.6701	-91.8723	80.0362	20.3371	7.3929
1940	-26.4397	-68.6706	-91.8723	80.0362	20.3371	7.3929
1210	-26.4475	-68.7429	-90.6807	80.029	20.5584	7.21123
1799	-26.4482	-68.7429	-90.6807	80.029	20.5584	7.21123
2010	-26.4499	-67.4322	-112.582	80.1192	2.67507	14.8305
1223	-26.4506	-68.8107	-90.0931	80.0253	20.5884	7.18755
1811	-26.4512	-68.8107	-90.0931	80.0253	20.5884	7.18755
2135	-26.458	-68.6888	-91.2724	80.0326	20.4723	7.28171
2406	-26.4585	-68.689	-91.2724	80.0326	20.4723	7.28171
2134	-26.461	-68.669	-91.8723	80.0362	20.3371	7.3929
1207	-26.4624	-68.6186	-92.4835	80.0398	20.1592	7.53837
1777	-26.4635	-68.6189	-92.4835	80.0398	20.1592	7.53837
2133	-26.4646	-68.6738	-91.8723	80.0362	20.3371	7.3929
1220	-26.4652	-68.8072	-90.0931	80.0253	20.5884	7.18755
1201	-26.4661	-68.7391	-90.6807	80.029	20.5584	7.21123
1593	-26.4667	-68.7393	-90.6807	80.029	20.5584	7.21123
1199	-26.467	-68.7396	-90.6807	80.029	20.5584	7.21123
1972	-26.471	-67.416	-113.939	80.1223	1.6852	15.7383
1219	-26.4761	-68.7823	-90.336	79.9994	19.9258	7.15858
1216	-26.4762	-68.726	-90.924	80.0031	19.851	7.19303
1747	-26.477	-68.7825	-90.336	79.9994	19.9258	7.15858
1834	-26.477	-68.7258	-90.924	80.0031	19.851	7.19303
1214	-26.479	-68.7329	-90.924	80.0031	19.851	7.19303
1614	-26.4797	-67.6967	-106.998	80.0772	8.77493	11.5617
355123	-26.48	-68.58	-92.7334	80.014	19.4125	7.5442
1225	-26.4854	-68.7088	-91.5172	80.0068	19.7353	7.27314
2199	-26.486	-68.7089	-91.5172	80.0068	19.7353	7.27314
1776	-26.49	-68.56	-93.3622	80.0176	19.2156	7.72154
2151	-26.4936	-68.673	-92.1193	80.0104	19.587	7.39245
2104	-26.4945	-68.766	-90.924	80.0031	19.851	7.19303
2731	-26.4957	-68.7204	-91.5172	80.0068	19.7353	7.27314
1234	-26.4973	-68.7701	-90.924	80.0031	19.851	7.19303
2414	-26.5001	-68.8117	-90.336	79.9994	19.9258	7.15858
1780	-26.5085	-68.6628	-92.1193	80.0104	19.587	7.39245
2103	-26.518	-67.704	-106.998	80.0772	8.77493	11.5617
2383	-26.5265	-68.6261	-92.3559	79.9843	18.6109	7.38296
2382	-26.5281	-68.6263	-92.3559	79.9843	18.6109	7.38296
1613	-26.529	-67.7112	-107.172	80.0516	8.8457	11.3905
1612	-26.5294	-67.7111	-107.172	80.0516	8.8457	11.3905
1746	-26.5706	-67.8172	-105.262	80.0442	10.9704	10.7299
1610	-26.617	-68.117	-100.354	79.9963	14.8811	9.45666
1353	-26.62	-68.12	-100.354	79.9963	14.8811	9.45666
355200	-26.623	-68.116	-100.354	79.9963	14.8811	9.45666
1292	-26.63	-68.36	-96.7819	79.9527	15.0599	8.53393
355190	-26.632	-68.361	-96.7819	79.9527	15.0599	8.53393
1300	-26.6414	-68.4533	-95.3777	79.9458	15.316	8.12117
1506	-26.6448	-68.1879	-99.0174	79.9629	14.5211	9.08122
2009	-26.65	-67.87	-104.759	79.988	11.0296	10.2114
2252	-26.6772	-67.7517	-106.727	79.9691	8.65842	10.5949
1334	-26.6832	-68.2438	-98.4678	79.9329	13.2936	8.87958
1659	-26.705	-67.249	-118.664	80.006	1.04844	18.1672
1430	-26.7092	-68.3982	-96.2737	79.9226	13.5871	8.31725
1846	-26.7231	-68.4097	-96.2737	79.9226	13.5871	8.31725
1956	-26.7239	-68.2099	-99.2303	79.9363	13.1419	9.03997
1802	-26.729	-67.205	-120.374	79.9835	0.559365	19.3183
1980	-26.732	-67.211	-120.374	79.9835	0.559365	19.3183
1555	-26.7335	-68.1996	-99.4196	79.9097	11.5043	9.00006
1784	-26.7453	-67.8036	-105.98	79.9387	8.4686	10.1958
2102	-26.7461	-68.4056	-96.4526	79.8959	11.7495	8.30223
2101	-26.7479	-68.4043	-96.4526	79.8959	11.7495	8.30223
1775	-26.75	-68.14	-100.196	79.9131	11.369	9.13713
1853	-26.75	-67.72	-107.798	79.9465	7.02214	10.8072
2336	-26.7562	-68.1775	-99.4196	79.9097	11.5043	9.00006
2286	-26.76	-67.8	-105.98	79.9387	8.4686	10.1958
1253	-26.7667	-67.7333	-106.875	79.9426	7.76692	10.4696
2751	-26.7705	-68.4476	-95.7523	79.8924	11.8089	8.09381
1609	-26.786	-67.729	-107.004	79.9159	6.64578	10.3584
355210	-26.789	-67.765	-107.004	79.9159	6.64578	10.3584
1917	-26.796	-68.4432	-95.9006	79.8657	9.73214	8.0782
355124	-26.8	-68.37	-97.3255	79.8726	9.68495	8.48318
1554	-26.8	-68.36	-97.3255	79.8726	9.68495	8.48318
2250	-26.8	-67.4	-114.413	79.9431	2.29065	14.5978
2251	-26.8	-67.3	-117.184	79.9504	1.30126	16.7165
2705	-26.8017	-67.7939	-106.117	79.9121	7.23951	10.0879
1939	-26.8035	-68.4596	-95.9006	79.8657	9.73214	8.0782
2149	-26.8063	-68.1715	-100.359	79.8864	9.55009	9.09186
1938	-26.8167	-68.4667	-95.9006	79.8657	9.73214	8.0782
2008	-26.8167	-68.35	-97.3255	79.8726	9.68495	8.48318
1937	-26.8182	-68.4555	-95.9006	79.8657	9.73214	8.0782
1739	-26.8185	-68.3059	-98.0632	79.8761	9.67893	8.6617
2334	-26.82	-68.195	-99.5816	79.8829	9.62573	8.96459
1648	-26.8268	-68.2212	-99.7129	79.8563	7.53306	8.93681
1646	-26.8396	-68.2521	-98.9452	79.8528	7.52526	8.80142
2148	-26.84	-68.16	-100.492	79.8598	7.51036	9.05546
1860	-26.8458	-67.3228	-117.218	79.924	0.942615	16.6148
2296	-26.8478	-68.2363	-98.9452	79.8528	7.52526	8.80142
2072	-26.855	-68.2851	-98.1902	79.8494	7.50045	8.64647
1790	-26.8642	-67.3114	-117.218	79.924	0.942615	16.6148
1767	-26.865	-67.255	-118.752	79.9276	0.553493	17.8039
1907	-26.8755	-68.4285	-96.1055	79.8124	5.06825	8.05365
2048	-26.8761	-68.319	-98.2839	79.8228	5.15878	8.63912
1902	-26.8802	-68.3385	-97.5409	79.8194	5.10483	8.4652
2214	-26.8808	-68.2925	-98.2839	79.8228	5.15878	8.63912
2071	-26.8833	-68.3167	-98.2839	79.8228	5.15878	8.63912
2213	-26.8833	-68.2833	-98.2839	79.8228	5.15878	8.63912
355861	-26.9	-68.27	-99.0412	79.8263	5.21601	8.79021
1774	-26.9	-67.275	-118.763	79.9012	0.123121	17.7025
2007	-26.9026	-68.3795	-96.8141	79.8159	5.06928	8.26915
2332	-26.907	-68.3332	-97.5409	79.8194	5.10483	8.4652
2586	-26.9123	-68.1353	-100.591	79.8332	5.28549	9.03123
2099	-26.913	-68.29	-98.2839	79.8228	5.15878	8.63912
2098	-26.92	-68.26	-99.0412	79.8263	5.21601	8.79021
2666	-26.9282	-68.0512	-102.242	79.8139	2.95559	9.19877
2730	-26.947	-68.3949	-96.8682	79.7895	2.56982	8.26899
2006	-26.981	-68.2967	-98.3635	79.7703	0.166261	8.65559
2364	-26.9928	-68.2878	-98.3635	79.7703	0.166261	8.65559
2005	-26.9959	-68.3217	-98.3635	79.7703	0.166261	8.65559
1731	-27.0073	-68.1704	-100.681	79.7807	0.46604	9.02958
1982	-27.021	-68.2155	-99.8978	79.7772	0.372908	8.92759
1730	-27.03	-68.3	-98.3471	79.7445	357.617	8.68095
355125	-27.033	-68.296	-98.3471	79.7445	357.617	8.68095
1307	-27.0333	-68.7833	-91.8329	79.709	359.874	6.25591
1391	-27.0355	-68.7298	-92.3835	79.7127	359.077	6.45818
2729	-27.0357	-68.8538	-91.298	79.7052	0.845053	6.10248
1635	-27.04	-68.38	-96.8684	79.7376	357.43	8.29159
1968	-27.0445	-68.1861	-99.8843	79.7514	357.86	8.95459
2361	-27.052	-68.9047	-90.7744	79.7014	1.97183	6.00882
2295	-27.0556	-68.881	-90.7744	79.7014	1.97183	6.00882
2211	-27.0595	-68.5408	-94.803	79.7271	357.497	7.52252
1789	-27.06	-68.48	-95.4685	79.7307	357.404	7.79671
2118	-27.06	-68.43	-96.1575	79.7342	357.389	8.05529
2210	-27.0667	-68.6333	-93.5459	79.72	357.999	6.96256
1782	-27.0667	-68.6133	-94.1621	79.7236	357.687	7.24117
2183	-27.0724	-68.25	-99.1096	79.748	357.737	8.83144
2184	-27.0724	-68.25	-99.1096	79.748	357.737	8.83144
2097	-27.0747	-68.2769	-98.3471	79.7445	357.617	8.68095
355862	-27.08	-68.8	-91.8176	79.6837	357.237	6.15141
1572	-27.08	-68.78	-91.8176	79.6837	357.237	6.15141
2448	-27.0809	-68.8588	-91.2934	79.68	358.254	5.97838
2356	-27.0833	-69	-89.7723	79.6688	2.26847	5.86034
2584	-27.0917	-68.832	-91.2934	79.68	358.254	5.97838
1729	-27.098	-68.8376	-91.2934	79.68	358.254	5.97838
1306	-27.098	-68.778	-91.8176	79.6837	357.237	6.15141
1312	-27.1	-68.78	-91.8176	79.6837	357.237	6.15141
2582	-27.1008	-68.7438	-92.3589	79.6874	356.421	6.37327
2004	-27.1029	-68.8169	-91.8176	79.6837	357.237	6.15141
355131	-27.105	-68.713	-92.921	79.6911	355.802	6.63192
1571	-27.1065	-68.8144	-91.8176	79.6837	357.237	6.15141
355130	-27.109	-68.541	-94.7542	79.7018	354.897	7.50803
2249	-27.11	-68.71	-92.921	79.6911	355.802	6.63192
1717	-27.11	-68.54	-94.7542	79.7018	354.897	7.50803
1455	-27.117	-68.55	-94.7542	79.7018	354.897	7.50803
2248	-27.1231	-68.7104	-92.921	79.6911	355.802	6.63192
2665	-27.1317	-69.0031	-89.7831	79.6442	359.944	5.68219
355220	-27.196	-68.561	-94.5598	79.6524	349.93	7.48195
355863	-27.27	-69	-89.7376	79.5964	355.174	5.32812
355140	-27.3	-69.13	-88.3127	79.5623	359.25	5.63233
2766	-27.3182	-68.4852	-94.8882	79.6083	345.608	7.79569
2147	-27.3447	-68.5425	-94.0539	79.5818	343.582	7.41665
2413	-27.524	-68.3717	-95.9759	79.5291	340.508	8.74512
2692	-27.583	-68.622	-92.2884	79.4695	336.764	6.64878
1874	-27.8754	-67.701	-104.177	79.413	342.62	11.3219
355870	-27.9	-68.8	-89.2711	79.3329	332.289	4.0625
2477	-27.904	-69.093	-87.7505	79.3103	339.605	2.99537
2478	-27.904	-69.0928	-87.7505	79.3103	339.605	2.99537
2381	-27.939	-68.86	-88.8099	79.3092	331.843	3.55746
1842	-27.95	-68.821	-89.0915	79.3129	332.475	3.8981
2691	-28.0074	-69.295	-86.5569	79.2545	355.185	3.65317
2727	-28.0188	-68.756	-89.2213	79.297	333.808	4.12387
1837	-28.024	-68.836	-88.651	79.2894	332.101	3.39591
2238	-28.0595	-69.4885	-84.946	79.2179	5.11475	6.07731
2726	-28.0662	-69.2982	-86.5279	79.2346	355.187	3.4481
2209	-28.1784	-69.6948	-82.6794	79.1396	9.67412	9.14945
2208	-28.1784	-69.6946	-82.6794	79.1396	9.67412	9.14945
2380	-28.711	-68.2761	-90.7277	79.0829	343.597	6.08811
2619	-28.7581	-69.7078	-84.2353	78.9125	13.8886	6.06555
12	-28.7581	-69.7078	-84.24	78.91	13.88	6.06
2198	-28.762	-69.714	-84.2353	78.9125	13.8886	6.06555
4	-28.762	-69.714	-84.24	78.91	13.88	6.06
1935	-28.793	-68.4577	-89.1791	79.039	345.743	4.27748
1	-28.793	-68.4577	-89.29	79.05	345.26	4.48
6	-28.8276	-68.2889	-90.26	79.03	344.01	5.45
2207	-28.8276	-68.2889	-90.2555	79.0345	344.013	5.45379
2247	-28.8516	-69.7706	-84.0254	78.8535	15.2344	6.50379
7	-28.8516	-69.7706	-83.46	78.84	14.99	7.41
2	-28.8582	-68.3513	-89.83	79.03	344.68	4.98
2003	-28.8582	-68.3513	-89.827	79.0304	344.681	4.9886
3	-28.9257	-68.3076	-90.12	79.01	344.28	5.22
2002	-28.9257	-68.3076	-89.98	78.9992	344.649	4.99401
9	-29.0125	-67.7751	-102.35	79.06	336.85	10.3
5	-29.0291	-68.5087	-88.5	78.93	353.14	2.76
2206	-29.0291	-68.5087	-88.5412	78.9368	353.149	2.76548
14	-29.1341	-68.8352	-87.63	78.86	48.22	1.13
2664	-29.1341	-68.8352	-87.7132	78.8336	57.8296	1.18761
15	-32.9544	-65.6665	-228.02	73.05	49.9	36.41
357800	-33.359	-69.77	-103.397	71.9344	16.0998	18.8643
357010	-33.425	-69.797	-102.953	71.8385	17.0734	19.4981
1781	-33.43	-70.75	-71.9875	71.7437	7.71358	23.1351
357801	-33.52	-69.83	-101.962	71.7922	17.3448	19.6572
2128	-33.7716	-70.0991	-97.1389	71.6023	19.3571	20.5241
357020	-33.789	-69.895	-104.565	71.5896	21.8558	21.7576
1788	-33.7974	-70.2	-94.5496	71.5678	19.1377	20.7227
1849	-34.0062	-68.7987	-148.817	71.583	33.0474	24.5731
1701	-34.0754	-69.7348	-115.821	71.4649	26.12	24.3848
2245	-34.086	-70.4947	-88.5843	71.4189	19.7213	23.1401
1801	-34.129	-70.54	-87.5231	71.3987	19.6667	23.5769
2197	-34.1436	-70.5727	-87.5231	71.3987	19.6667	23.5769
357021	-34.164	-69.832	-113.194	71.4409	26.235	24.3222
2724	-34.1833	-70.1	-105.026	71.4101	25.1065	23.8513
2235	-34.1909	-70.6127	-86.4376	71.3792	19.5963	24.0022
2640	-34.1936	-70.6257	-84.497	71.3758	19.093	24.2108
2663	-34.216	-70.5167	-90.2499	71.3859	20.7046	23.6823
2447	-34.2266	-70.5516	-89.2133	71.3674	20.5484	24.0748
2204	-34.2459	-70.5583	-89.2133	71.3674	20.5484	24.0748
1887	-34.2483	-69.0128	-148.21	71.4609	29.9792	25.7777
2446	-34.2699	-70.5757	-87.2814	71.364	20.0167	24.2268
1473	-34.3163	-69.0655	-147.615	71.4399	29.5639	25.9488
1645	-34.3209	-69.0532	-147.615	71.4399	29.5639	25.9488
1437	-34.3252	-69.0651	-148.956	71.4237	29.5489	26.1839
1787	-34.4606	-69.1919	-145.7	71.385	28.8041	26.2711
1927	-34.4637	-68.8096	-161.791	71.4115	31.2245	27.5431
1778	-34.4902	-69.1721	-149.028	71.3749	28.9607	26.5786
1521	-34.5299	-69.207	-148.363	71.3602	28.7494	26.6111
1899	-34.5505	-68.9795	-156.499	71.3714	29.5892	27.3278
1967	-34.5505	-68.9795	-156.499	71.3714	29.5892	27.3278
1384	-34.5844	-68.978	-157.923	71.3597	29.4785	27.5949
357022	-34.608	-70.295	-106.016	71.2966	24.1312	25.894
1835	-34.6183	-68.9759	-157.923	71.3597	29.4785	27.5949
1422	-34.6316	-69.029	-157.259	71.3463	29.1183	27.6325
1810	-34.647	-68.9662	-161.474	71.3516	29.6292	28.1082
2189	-34.647	-68.9662	-161.474	71.3516	29.6292	28.1082
357023	-34.65	-70.05	-117.288	71.3025	26.1418	26.1302
1383	-34.6572	-69.0313	-157.259	71.3463	29.1183	27.6325
357802	-34.67	-69	-159.359	71.3489	29.3588	27.868
2130	-34.7321	-70.7358	-90.426	71.2012	20.4316	26.2553
2239	-34.746	-70.7933	-88.3129	71.1911	20.2222	26.2713
2237	-34.7796	-70.7301	-91.3846	71.1825	20.3625	26.3637
2027	-34.7803	-70.6645	-95.6248	71.2027	20.8292	26.4229
1394	-34.8001	-70.3451	-108.343	71.2475	22.9172	26.6955
357030	-34.814	-70.352	-108.343	71.2475	22.9172	26.6955
1299	-34.8159	-70.3556	-108.343	71.2475	22.9172	26.6955
2080	-34.8525	-70.52	-103.017	71.2127	21.5294	26.7483
357024	-34.917	-69.981	-125.317	71.2615	25.2067	26.5842
2176	-34.9816	-70.4691	-108.265	71.1712	20.9226	27.2581
357805	-34.987	-70.456	-108.265	71.1712	20.9226	27.2581
1454	-35.1168	-69.8151	-138.328	71.2451	25.8345	26.7066
357041	-35.123	-69.9	-134.188	71.2342	24.9668	26.8115
1287	-35.1272	-69.8149	-139.549	71.2361	25.7252	26.9009
1331	-35.143	-69.8223	-139.549	71.2361	25.7252	26.9009
1396	-35.151	-69.8356	-137.467	71.2301	25.2643	26.9243
1251	-35.1526	-69.8225	-139.549	71.2361	25.7252	26.9009
357040	-35.223	-70.568	-107.754	71.0448	18.8909	27.5675
2750	-35.4889	-71.0798	-89.0723	70.4108	17.8454	25.4813
2714	-35.5149	-71.0294	-91.1319	70.4521	17.5191	25.604
2614	-35.5167	-71.0482	-91.1319	70.4521	17.5191	25.604
2181	-35.5471	-70.893	-98.2061	70.5044	16.3236	26.1904
2132	-35.5509	-70.8946	-98.2061	70.5044	16.3236	26.1904
357042	-35.558	-70.496	-116.318	70.7875	16.2259	28.723
1553	-35.5667	-70.9952	-93.9939	70.4234	16.8838	25.6771
357050	-35.58	-70.75	-105.525	70.555	15.4383	27.2201
1716	-35.5815	-70.6914	-107.784	70.593	15.3806	27.5937
1892	-35.5999	-71.0531	-92.6999	70.3072	16.8985	25.3647
357060	-35.653	-70.761	-106.278	70.4881	15.0704	27.2785
1552	-35.6748	-70.6558	-110.856	70.5671	15.0185	28.0791
1608	-35.675	-70.656	-111.617	70.5004	14.6689	28.2105
2404	-35.6834	-71.0284	-94.197	70.1486	16.2881	25.133
2234	-35.6843	-71.0864	-92.1775	70.1011	16.6799	24.9154
2089	-35.6852	-71.0735	-94.197	70.1486	16.2881	25.133
2503	-35.6866	-70.9381	-98.3207	70.2413	15.583	25.727
2282	-35.6873	-70.9553	-98.3207	70.2413	15.583	25.727
2366	-35.6885	-71.0343	-94.197	70.1486	16.2881	25.133
2613	-35.6954	-71.0327	-94.197	70.1486	16.2881	25.133
2559	-35.7078	-70.4042	-123.776	70.6915	15.8683	29.9528
1698	-35.7185	-70.4135	-123.776	70.6915	15.8683	29.9528
2139	-35.7431	-70.3619	-127.197	70.6691	16.0555	30.537
1697	-35.7623	-70.5307	-117.17	70.5134	14.5937	29.216
357804	-35.78	-70.48	-120.435	70.4857	14.5513	29.8624
1630	-35.814	-70.8466	-103.995	70.1714	14.4291	26.5213
1728	-35.896	-70.6428	-114.553	70.1957	13.5607	28.8593
1667	-35.8995	-70.6406	-114.553	70.1957	13.5607	28.8593
1580	-35.9011	-70.6397	-114.553	70.1957	13.5607	28.8593
1510	-35.9045	-70.6383	-114.553	70.1957	13.5607	28.8593
1592	-35.9155	-70.6305	-114.553	70.1957	13.5607	28.8593
1591	-35.9234	-70.3679	-129.912	70.4722	15.3073	31.6826
2558	-35.9254	-70.6206	-117.731	70.1601	13.4601	29.6397
2713	-35.9416	-70.5616	-120.25	70.2091	13.629	30.2013
1682	-35.944	-70.593	-117.731	70.1601	13.4601	29.6397
1715	-35.9443	-70.5926	-117.731	70.1601	13.4601	29.6397
2463	-35.9472	-70.5819	-117.731	70.1601	13.4601	29.6397
1626	-35.9696	-70.5884	-117.731	70.1601	13.4601	29.6397
1641	-35.9696	-70.5884	-117.731	70.1601	13.4601	29.6397
2196	-35.9727	-70.5874	-117.731	70.1601	13.4601	29.6397
1658	-35.973	-70.5493	-120.25	70.2091	13.629	30.2013
1551	-35.9734	-70.5486	-120.25	70.2091	13.629	30.2013
1579	-35.9745	-70.5746	-120.25	70.2091	13.629	30.2013
1453	-35.9747	-70.5686	-120.25	70.2091	13.629	30.2013
357062	-35.989	-70.849	-106.68	69.8141	13.5825	26.7133
2138	-36.0043	-70.4994	-123.615	70.1739	13.717	31.0477
1934	-36.0159	-70.5088	-123.615	70.1739	13.717	31.0477
2195	-36.0169	-70.4889	-123.615	70.1739	13.717	31.0477
357061	-36.058	-70.492	-124.409	70.0866	13.5875	31.3752
357063	-36.193	-71.161	-97.0296	69.1088	15.3075	23.6344
357064	-36.286	-71.009	-104.181	69.0663	14.2266	25.1734
357065	-36.45	-70.92	-110.389	68.8776	13.8133	26.9732
2723	-36.6297	-70.2312	-151.356	69.1673	14.1137	39.7126
357067	-36.638	-70.432	-137.705	68.9466	13.0346	36.5146
1236	-36.7986	-71.4221	-95.791	67.9192	16.5806	22.6414
1174	-36.8031	-71.415	-95.791	67.9192	16.5806	22.6414
1186	-36.8058	-71.3949	-95.791	67.9192	16.5806	22.6414
1235	-36.8084	-71.4328	-94.0126	67.886	16.4788	22.6504
1267	-36.8167	-71.5409	-90.4326	67.82	16.0763	22.8779
1249	-36.8191	-71.3559	-97.5715	67.9524	16.6053	22.7171
1226	-36.8283	-71.444	-94.6707	67.8126	16.4193	22.7045
1237	-36.8292	-71.444	-94.6707	67.8126	16.4193	22.7045
1229	-36.8312	-71.4417	-94.6707	67.8126	16.4193	22.7045
1260	-36.8314	-71.6619	-87.4215	67.6797	15.3511	23.3725
1180	-36.8419	-71.5009	-92.8824	67.7795	16.2325	22.7906
1243	-36.8475	-71.7	-85.555	67.6463	14.9883	23.6303
1239	-36.8552	-71.6522	-87.4215	67.6797	15.3511	23.3725
1258	-36.867	-71.6259	-87.4215	67.6797	15.3511	23.3725
357070	-36.868	-71.378	-96.453	67.8457	16.5347	22.6932
1240	-36.8683	-71.6348	-87.4215	67.6797	15.3511	23.3725
1254	-36.8689	-71.6226	-89.2627	67.7131	15.6868	23.1378
1172	-36.8747	-71.4452	-94.6707	67.8126	16.4193	22.7045
1190	-36.8769	-71.3515	-98.9024	67.804	16.5018	22.8181
1238	-36.8796	-71.426	-95.3277	67.7374	16.3307	22.7605
1218	-36.8814	-71.4291	-95.3277	67.7374	16.3307	22.7605
1233	-36.8828	-71.459	-95.3277	67.7374	16.3307	22.7605
1222	-36.8838	-71.4546	-95.3277	67.7374	16.3307	22.7605
1196	-36.885	-71.3301	-98.9024	67.804	16.5018	22.8181
1241	-36.8908	-71.5539	-91.7285	67.6706	15.8701	23.0046
1256	-36.8913	-71.5508	-91.7285	67.6706	15.8701	23.0046
1215	-36.893	-71.414	-97.1143	67.7708	16.4569	22.7458
1230	-36.8935	-71.4358	-95.3277	67.7374	16.3307	22.7605
1206	-36.8937	-71.3391	-98.9024	67.804	16.5018	22.8181
1193	-36.8958	-71.3557	-98.9024	67.804	16.5018	22.8181
1228	-36.9018	-71.481	-93.5346	67.704	16.1315	22.8508
1217	-36.9034	-71.4222	-97.1143	67.7708	16.4569	22.7458
1166	-36.92	-71.4608	-95.3277	67.7374	16.3307	22.7605
2281	-37.106	-70.161	-169.399	68.3498	11.2408	44.6915
2093	-37.128	-70.135	-170.453	68.249	10.7185	45.0116
2035	-37.142	-69.947	-188.7	68.4172	12.0818	47.592
2280	-37.144	-70.152	-170.453	68.249	10.7185	45.0116
357072	-37.144	-70.033	-179.382	68.3323	11.3172	46.4212
2232	-37.149	-69.934	-188.7	68.4172	12.0818	47.592
2518	-37.151	-69.934	-188.7	68.4172	12.0818	47.592
2144	-37.152	-69.941	-188.7	68.4172	12.0818	47.592
2683	-37.1531	-70.2056	-166.154	68.2082	10.4883	44.2141
1340	-37.154	-69.943	-188.7	68.4172	12.0818	47.592
2436	-37.16	-69.963	-188.7	68.4172	12.0818	47.592
2498	-37.164	-69.966	-188.7	68.4172	12.0818	47.592
2070	-37.164	-69.937	-188.7	68.4172	12.0818	47.592
2178	-37.166	-69.943	-188.7	68.4172	12.0818	47.592
2319	-37.1806	-70.246	-162.897	68.0699	9.82946	43.6213
1970	-37.184	-70.053	-180.506	68.2277	10.7396	46.7495
2557	-37.19	-70.058	-180.506	68.2277	10.7396	46.7495
2612	-37.198	-70.061	-180.506	68.2277	10.7396	46.7495
2401	-37.2	-70.076	-175.932	68.1875	10.4438	46.0628
2442	-37.201	-69.888	-194.8	68.3505	11.8623	48.4428
2654	-37.203	-70.057	-180.506	68.2277	10.7396	46.7495
2517	-37.209	-70.065	-180.506	68.2277	10.7396	46.7495
2471	-37.223	-69.771	-209.759	68.4758	13.275	49.6147
2542	-37.225	-70.138	-172.442	68.0453	9.66659	45.5956
2466	-37.227	-69.924	-196.061	68.2407	11.2073	48.7752
2465	-37.229	-69.916	-196.061	68.2407	11.2073	48.7752
2039	-37.306	-70.122	-177.936	67.9781	9.35074	46.6384
2510	-37.307	-70.202	-168.938	67.9047	8.99119	45.0143
2544	-37.309	-70.126	-173.374	67.9412	9.14849	45.86
2321	-37.31	-70.114	-177.936	67.9781	9.35074	46.6384
1696	-37.376	-71.3451	-105.144	66.8858	13.4731	23.121
357080	-37.406	-71.349	-105.144	66.8858	13.4731	23.121
1242	-37.75	-71.3	-110.419	66.0908	10.2982	23.4553
1266	-37.75	-71.3	-110.419	66.0908	10.2982	23.4553
1165	-37.85	-71.15	-117.044	65.9462	9.50787	24.7249
357090	-37.856	-71.183	-115.077	65.9135	9.6208	24.2145
1169	-37.9167	-71.4333	-106.034	65.6411	9.2186	23.423
357091	-37.92	-71.45	-106.034	65.6411	9.2186	23.423
2243	-38.0094	-71.6426	-99.1354	65.3281	8.33516	24.3512
1227	-38.0733	-70.7526	-137.467	65.6845	7.05945	32.9041
1187	-38.0798	-70.8495	-132.559	65.5123	7.67276	30.4325
2379	-38.0813	-71.7261	-95.8762	65.1056	8.05043	25.0471
2411	-38.0984	-71.7296	-95.8762	65.1056	8.05043	25.0471
2047	-38.1809	-71.949	-88.2787	64.8902	8.02816	26.3401
2203	-38.2053	-71.2565	-115.951	65.1247	9.34426	24.31
2092	-38.2122	-71.1274	-119.916	65.1649	9.21901	25.1968
2001	-38.2136	-71.8281	-92.505	64.9169	8.08332	25.7187
2662	-38.2339	-71.8089	-94.9506	64.8601	8.31378	25.3979
2294	-38.2479	-71.0227	-126.723	65.1293	8.87132	27.4862
357092	-38.255	-71.167	-120.339	65.0732	9.38299	25.2848
1257	-38.3	-71.6333	-101.36	64.8328	8.8226	24.5593
1265	-38.3	-71.6333	-101.36	64.8328	8.8226	24.5593
357093	-38.31	-71.645	-101.36	64.8328	8.8226	24.5593
2445	-38.3163	-71.4698	-109.093	64.891	9.39351	23.9427
2410	-38.3392	-71.8135	-95.7324	64.7321	8.75086	25.4064
1248	-38.3667	-71.5833	-103.715	64.7805	9.17559	24.3848
357100	-38.379	-71.586	-104.122	64.7194	9.41746	24.4406
2409	-38.4472	-71.0856	-124.241	64.7794	10.2965	26.355
1386	-38.4858	-71.8267	-94.9443	64.5637	9.59129	25.6709
2690	-38.4901	-70.9521	-131.482	64.7495	10.1605	29.1175
2661	-38.5042	-70.9152	-133.919	64.7607	9.95488	30.2246
357101	-38.509	-70.898	-133.919	64.7607	9.95488	30.2246
2580	-38.5231	-70.8641	-136.475	64.7719	9.73846	31.4384
2091	-38.5314	-71.0393	-127.439	64.6691	10.8597	27.4244
2623	-38.534	-70.8873	-134.492	64.6987	10.3532	30.4255
357808	-38.58	-71.58	-105.882	64.5182	10.5792	24.6761
2330	-38.5967	-70.9091	-135.093	64.6425	10.765	30.6492
2378	-38.6328	-71.0909	-126.368	64.5599	11.68	27.0444
2377	-38.6343	-71.0029	-130.857	64.5759	11.4928	28.7281
2376	-38.6488	-70.8932	-135.723	64.5919	11.1842	30.8964
357809	-38.679	-70.814	-141.788	64.5606	11.2542	33.794
357110	-38.692	-71.729	-100.899	64.4115	11.0322	25.2295
1393	-38.8124	-71.7111	-103.928	64.3436	11.7618	25.1152
357111	-38.97	-71.52	-113.509	64.2661	12.9356	25.242
357102	-39.02	-70.37	-182.235	64.4064	12.358	49.1769
1522	-39.0671	-71.7614	-104.78	64.107	13.1914	25.2988
1819	-39.0888	-71.5818	-111.334	64.0976	13.4025	25.3512
2608	-39.1242	-72.0697	-93.3377	63.9322	13.8155	25.9838
2677	-39.1384	-72.059	-93.988	63.851	13.9729	25.9147
2000	-39.1477	-71.4798	-115.957	64.0719	13.6427	25.7429
1999	-39.1485	-71.4452	-117.986	64.0886	13.7326	25.9897
2637	-39.1555	-72.0585	-93.988	63.851	13.9729	25.9147
2636	-39.156	-72.0558	-93.988	63.851	13.9729	25.9147
2660	-39.1597	-72.0607	-93.988	63.851	13.9729	25.9147
2689	-39.1599	-71.5439	-113.946	64.0547	13.573	25.5571
2087	-39.1667	-71.5333	-113.946	64.0547	13.573	25.5571
357810	-39.17	-71.4	-120.04	64.1047	13.8395	26.3043
357811	-39.17	-70.53	-168.154	64.3082	13.7138	44.9227
2659	-39.1724	-72.03	-93.988	63.851	13.9729	25.9147
1997	-39.1757	-71.5595	-114.574	63.9885	13.6422	25.6617
1818	-39.1803	-71.4312	-118.634	64.027	13.7944	26.1551
2408	-39.2055	-71.974	-98.666	63.8105	13.8887	25.574
1704	-39.2229	-71.5728	-114.574	63.9885	13.6422	25.6617
357112	-39.25	-71.75	-107.235	63.8192	13.6584	25.3179
1452	-39.2754	-71.5325	-115.842	63.829	13.6348	25.8792
357812	-39.35	-71.55	-116.478	63.7334	13.5635	25.9935
1578	-39.3516	-71.5509	-116.478	63.7334	13.5635	25.9935
357120	-39.42	-71.93	-101.212	63.3557	13.7909	25.3314
1577	-39.4335	-71.8721	-105.767	63.2879	13.4962	25.2139
1864	-39.4443	-71.854	-105.767	63.2879	13.4962	25.2139
1873	-39.449	-71.8521	-105.767	63.2879	13.4962	25.2139
1597	-39.4639	-71.5147	-119.82	63.5402	13.366	26.6213
357121	-39.5	-71.7	-112.295	63.2563	13.1545	25.5107
1848	-39.5527	-72.3368	-86.9695	62.5179	12.8045	26.4646
357122	-39.637	-71.502	-122.372	62.9361	12.6802	27.3683
1666	-39.6667	-72	-102.263	62.4445	12.6263	25.1751
357813	-39.68	-72.008	-102.826	62.2314	12.2693	25.1608
1996	-39.6826	-72.0103	-102.826	62.2314	12.2693	25.1608
2293	-39.6908	-72.0134	-102.826	62.2314	12.2693	25.1608
357123	-39.887	-71.58	-121.099	61.7512	11.781	27.2749
1960	-39.9167	-71.6	-121.099	61.7512	11.781	27.2749
1959	-39.9244	-71.6001	-121.099	61.7512	11.781	27.2749
357130	-39.927	-72.027	-103.386	60.9721	9.86211	25.5055
1885	-39.9667	-71.6167	-121.684	61.5025	11.6487	27.5151
1872	-39.9681	-71.617	-121.684	61.5025	11.6487	27.5151
1932	-39.9687	-71.5936	-121.684	61.5025	11.6487	27.5151
1841	-40.0773	-72.5125	-85.2316	59.7837	4.3623	28.2917
357140	-40.35	-72.07	-106.353	59.0081	5.85645	27.102
2292	-40.3595	-71.791	-117.146	59.2274	8.43386	27.713
2202	-40.4069	-72.2718	-97.7639	58.6573	3.41528	28.1863
1931	-40.4229	-72.4574	-88.4947	58.5405	1.85508	29.2129
1744	-40.4253	-72.2853	-95.6334	58.4399	2.63018	28.6803
1508	-40.46	-72.2	-100.205	58.4978	3.50396	28.1731
2045	-40.4936	-72.5173	-86.2599	58.1746	1.08713	29.7314
1382	-40.5153	-72.2512	-98.0842	58.2909	2.738	28.6519
1587	-40.5172	-72.2484	-98.0842	58.2909	2.738	28.6519
1330	-40.5182	-72.243	-98.0842	58.2909	2.738	28.6519
1640	-40.5206	-72.1081	-104.905	58.3745	4.12821	28.0442
1403	-40.5221	-72.1538	-102.652	58.3454	3.63665	28.2096
1855	-40.5313	-72.1093	-105.11	58.2003	3.8062	28.3123
1288	-40.54	-72.15	-102.833	58.1742	3.3329	28.4636
1445	-40.5417	-72.1931	-100.538	58.1493	2.88845	28.6571
1504	-40.5463	-72.0909	-105.11	58.2003	3.8062	28.3123
1809	-40.5476	-72.0333	-107.374	58.2274	4.30344	28.2189
1439	-40.5496	-72.1048	-105.11	58.2003	3.8062	28.3123
1397	-40.5514	-72.0919	-105.11	58.2003	3.8062	28.3123
1489	-40.5538	-72.1898	-100.538	58.1493	2.88845	28.6571
1410	-40.5538	-72.19	-100.538	58.1493	2.88845	28.6571
1390	-40.5578	-72.1009	-105.11	58.2003	3.8062	28.3123
1357	-40.559	-72.1008	-105.11	58.2003	3.8062	28.3123
1290	-40.5675	-72.1743	-102.833	58.1742	3.3329	28.4636
1603	-40.5733	-72.1681	-102.833	58.1742	3.3329	28.4636
1279	-40.5758	-72.147	-103.002	58.0151	3.0753	28.7117
1568	-40.5769	-72.1681	-103.002	58.0151	3.0753	28.7117
1252	-40.5769	-72.1063	-105.302	58.0383	3.52672	28.5757
1520	-40.5773	-72.1692	-103.002	58.0151	3.0753	28.7117
1356	-40.5806	-72.0714	-107.591	58.0625	4.0039	28.4972
1488	-40.5826	-72.1191	-105.302	58.0383	3.52672	28.5757
1255	-40.5834	-72.098	-105.302	58.0383	3.52672	28.5757
357150	-40.59	-72.117	-105.302	58.0383	3.52672	28.5757
1259	-40.5909	-72.0719	-107.591	58.0625	4.0039	28.4972
1381	-40.5917	-72.1048	-105.302	58.0383	3.52672	28.5757
1286	-40.5983	-72.1063	-105.302	58.0383	3.52672	28.5757
1632	-40.6064	-72.1329	-103.002	58.0151	3.0753	28.7117
1332	-40.6104	-72.1214	-105.302	58.0383	3.52672	28.5757
1699	-40.64	-72.1435	-103.16	57.8679	2.8645	28.9514
1545	-40.6453	-72.1968	-100.822	57.8484	2.46915	29.1125
357152	-40.768	-71.943	-112.897	57.6748	4.21968	29.4554
357153	-40.771	-72.153	-103.453	57.6075	2.58266	29.3984
2044	-40.7821	-72.407	-91.4914	57.431	1.30257	30.2479
1743	-40.9169	-72.397	-91.6518	57.2407	1.55762	30.4341
2090	-40.957	-72.4952	-86.7899	57.1311	1.623	30.5747
1871	-40.9583	-72.3954	-91.7454	57.1547	1.73536	30.5077
357160	-40.969	-72.264	-99.128	57.1837	2.12145	30.258
1414	-41.0432	-72.5027	-87.0044	56.9671	2.13372	30.6339
1840	-41.0675	-72.478	-87.0044	56.9671	2.13372	30.6339
1836	-41.069	-72.4779	-87.0044	56.9671	2.13372	30.6339
1413	-41.0697	-72.4672	-89.4865	56.9814	2.13772	30.642
1481	-41.0714	-72.5826	-82.0517	56.9326	2.19185	30.5019
1412	-41.0733	-72.4611	-89.4865	56.9814	2.13772	30.642
358010	-41.105	-72.496	-87.1349	56.8866	2.41184	30.6503
1365	-41.1131	-72.6072	-82.1856	56.8474	2.50063	30.4998
1500	-41.1422	-72.4191	-92.2447	56.8377	2.66278	30.6913
1534	-41.1425	-72.5799	-82.3374	56.76	2.8151	30.4921
1509	-41.1502	-72.4307	-89.7625	56.8226	2.66938	30.6887
358011	-41.157	-71.885	-117.202	56.8856	4.10796	31.7179
358012	-41.25	-72.27	-100.029	56.7053	3.23036	30.767
1550	-41.2753	-72.6344	-80.458	56.4243	3.86422	30.2829
1400	-41.278	-72.6452	-80.458	56.4243	3.86422	30.2829
1358	-41.3024	-72.5662	-85.3558	56.5012	3.64715	30.5615
2291	-41.3092	-72.5391	-85.3558	56.5012	3.64715	30.5615
2316	-41.3114	-72.5544	-85.3558	56.5012	3.64715	30.5615
1480	-41.3156	-72.6682	-80.458	56.4243	3.86422	30.2829
1725	-41.3162	-72.6725	-80.458	56.4243	3.86422	30.2829
1499	-41.3191	-72.5783	-82.8999	56.4653	3.74854	30.441
1311	-41.3244	-72.6612	-80.458	56.4243	3.86422	30.2829
358020	-41.33	-72.618	-83.122	56.3496	4.04456	30.416
1549	-41.3301	-72.6802	-78.2667	56.2508	4.30545	30.0565
1492	-41.3335	-72.6513	-80.6854	56.303	4.16907	30.2549
1355	-41.3349	-72.6234	-83.122	56.3496	4.04456	30.416
1930	-41.3359	-72.0661	-110.472	56.5148	4.03914	31.4553
1406	-41.3484	-72.5979	-83.122	56.3496	4.04456	30.416
1310	-41.3498	-72.5961	-83.122	56.3496	4.04456	30.416
1423	-41.3523	-72.5948	-83.122	56.3496	4.04456	30.416
358021	-41.363	-72.005	-113.031	56.5077	4.19595	31.7452
1657	-41.446	-72.297	-98.3929	56.2775	4.12232	30.8825
358022	-41.755	-72.396	-95.1088	55.0982	5.4146	30.7175
358023	-41.874	-72.431	-93.3129	54.4886	5.84585	30.5413
358024	-41.88	-72.58	-86.453	53.9306	6.43016	29.9766
358030	-42.377	-72.578	-90.3308	49.934	7.29773	29.7926
358040	-42.799	-72.445	-100.74	47.0515	6.81346	31.3034
358041	-42.833	-72.646	-91.5214	46.5711	6.51605	30.0073
358050	-43.189	-72.794	-86.8538	44.4795	5.26712	29.7033
358049	-43.497	-72.81	-88.5507	42.8807	4.95092	30.4513
358051	-43.78	-72.47	-107.801	41.417	5.7055	32.776
358052	-44.08	-72.88	-87.5171	39.8557	6.27915	31.5546
